Matosin et al.

Article

# Genotype and age influence cortical-*FKBP5* at multiple regulatory and single-cell-type levels in severe psychiatric disorders

Natalie Matosin<sup>1,2,3\*</sup>, Janine Arloth<sup>1,4</sup>, Silvia Martinelli<sup>1</sup>, Darina Czamara<sup>1</sup>, Malosree Maitra<sup>5</sup>, Thorhildur Halldorsdottir<sup>6</sup>, Cristiana Cruceanu<sup>1</sup>, Dominic Kaul<sup>2,3</sup>, Nils C. Gassen<sup>1,7</sup>, Kathrin Hafner<sup>1</sup>, Nikola S Müller<sup>4</sup>, Karolina Worf<sup>4</sup>, Ghalia Rehawi<sup>1,4</sup>, Corina Nagy<sup>5,13</sup>, Elizabeth Scarr<sup>8</sup>, Ran Tao<sup>9</sup>, Andrew E. Jaffe<sup>9</sup>, Thomas Arzberger<sup>10,11</sup>, Peter Falkai<sup>10</sup>, Joel E. Kleinmann<sup>9,12</sup>, Daniel R. Weinberger<sup>9,12</sup>, Naguib Mechawar<sup>5,13</sup>, Andrea Schmitt<sup>10,14</sup>, Brian Dean<sup>15</sup>, Gustavo Turecki<sup>5,13,16</sup>, Thomas M. Hyde<sup>9,12</sup>, Elisabeth B. Binder<sup>1,17\*</sup>

<sup>1</sup> Department of Translational Research in Psychiatry, Max-Planck Institute of Psychiatry, Munich, Germany

<sup>2</sup> Illawarra Health and Medical Research Institute, Northfields Ave, Wollongong 2522, Australia

<sup>3</sup> Molecular Horizons, School of Chemistry and Molecular Biosciences, Faculty of Science, Medicine and Health, University of Wollongong, Northfields Ave, Wollongong 2522, Australia

<sup>4</sup> Institute of Computational Biology, Helmholtz Zentrum München, Neuherberg 85764, Germany

<sup>5</sup> McGill Group for Suicide Studies, Douglas Mental Health University Institute, Montreal, Quebec, Canada

<sup>6</sup> Department of Psychology, Reykjavik University, Reykjavik, Iceland

<sup>7</sup> Neurohomeostasis Research Group, Institute of Psychiatry, University of Bonn, Clinical Centre, Bonn, Germany

<sup>8</sup> Melbourne Veterinary School, Faculty of Veterinary and Agricultural Sciences, The University of Melbourne, Parkville, Victoria 3010

<sup>9</sup> The Lieber Institute for Brain Development, Johns Hopkins University Medical Campus, Baltimore, MD, USA

<sup>10</sup> Department of Psychiatry and Psychotherapy, University Hospital, Ludwig-Maximilians University Munich, Nussbaumstrasse 7, 80336 Munich, Germany

<sup>11</sup> Centre for Neuropathology and Prion Research, Ludwig-Maximilians University Munich, Nussbaumstrasse 7, 80336 Munich, Germany

<sup>12</sup> Department of Psychiatry and Behavioral Sciences at Johns Hopkins University School of Medicine

<sup>13</sup> Department of Psychiatry, McGill University, Montreal, Quebec, Canada

<sup>14</sup> Laboratory of Neuroscience (LIM27), Institute of Psychiatry, University of Sao Paulo, Rua Dr. Ovidio Pires de Campos 785, 05453-010 São Paulo, Brazil

<sup>15</sup> Molecular Psychiatry Laboratory, Florey Institute for Neuroscience and Mental Health, Parkville, VIC, Australia

<sup>16</sup> Department of Human Genetics, McGill University, Montreal, Quebec, Canada

<sup>17</sup> Department of Psychiatry and Behavioral Sciences, Emory University School of Medicine, Atlanta, USA

## \* Correspondence

Email: [nmatosin@uow.edu.au](mailto:nmatosin@uow.edu.au)

Email: [binder@psych.mpg.de](mailto:binder@psych.mpg.de)

**Keywords:** FKBP5, psychosis, depression, aging, epigenetics, stress

## Word counts

Title: 15/15 words

Abstract: 149/150 words

Main Text: 4513/5000 words

Methods: 3000/3000 words

Display items: 6/10 items

References: 56/70 references

Matosin et al.

**ABSTRACT (149/150 words)**

Deducing genes capable of classifying biologically-distinct psychiatric subtypes, and their targets for treatment, is a priority approach in psychiatry. *FKBP5* is one such gene with strong evidence of utility to delineate a trans-diagnostic psychiatric subtype. Yet how brain-expressed *FKBP5* is affected in psychiatric disorders in humans is not fully understood and critical for propelling *FKBP5*-targeting treatment development. We performed a large-scale postmortem study (n=895) of *FKBP5* using dorsolateral prefrontal cortex samples derived from individuals with severe psychiatric disorders with a comprehensive battery of bulk/single-cell omics and histological analyses. We observed consistently heightened *FKBP5* mRNA and protein in psychopathology, moderated by genotype and age, and accompanied by DNA methylation changes in key enhancers. These effects were most prominent in superficial-layer pyramidal cells. Heightened *FKBP5* was also differentially associated with downstream pathways according to age, being specifically associated with synaptic transmission in early adulthood, and neuroinflammation and neurodegeneration in later life.

Matosin et al.

## MAIN TEXT (4513/5000 words)

### INTRODUCTION

The approved use of available drugs for specific psychiatric diagnoses – and their prescription to specific patients – are currently not based on biological knowledge of the pathological mechanisms that contribute to an individual's disease presentation. Increased understanding of the genetic and molecular underpinnings of psychiatric disease is critical to facilitate mechanism-based diagnoses of biologically distinct patient subgroups, and the corresponding biological targets for their treatment<sup>1</sup>. Yet very few genes have been translated from genetic studies to mechanistic and biomarker levels in various populations; FKBP51 is one of these few. FKBP51 is encoded by the gene *FKBP5* on chromosome 6p21.31, and is an allosteric heat shock protein 90 kDa (HSP90) co-chaperone of the glucocorticoid receptor (GR). FKBP51 is highly responsive to glucocorticoid (cortisol)-mediated stress, and physiologically important for propagating and terminating the stress response<sup>2</sup>. Human genetic, epigenetic and animal studies consistently indicate that heightened FKBP51 expression in individuals exposed to early life adversity may contribute to psychiatric disease risk in a subset of patients<sup>3</sup>. FKBP51 antagonism is a proposed therapeutic mechanism for this patient subgroup<sup>3</sup>.

*FKBP5* transcription throughout the body has been shown to naturally increase over the lifespan,<sup>3, 4, 5</sup> and this expression over time is likely moderated by several factors including stress and genetic variants. Glucocorticoid-induced *FKBP5* transcription is triggered by activation of glucocorticoid response elements (GREs) located within upstream enhancers and intronic regions of *FKBP5*<sup>6</sup>. The strength of this induction is moderated by two mechanisms, genetic and epigenetic. Firstly, minor allele carriers of a functional common *FKBP5* haplotype (tagged by the single nucleotide polymorphism [SNP] rs1360780 T allele in intron 2) show exacerbated *FKBP5* induction following stress or glucocorticoid exposure. Secondly, reduced DNA methylation (DNAm) at key *FKBP5* GREs is also associated with higher *FKBP5* mRNA induction<sup>7, 8</sup>. These two mechanisms appear to converge and compound in some individuals: DNAm at *FKBP5* GREs is decreased in individuals who carry the *FKBP5* minor allele haplotype and who have been specifically exposed to early life adversity, a major risk factor for psychiatric disease<sup>9, 10</sup>. The genetic predisposition combined with exposure to early life adversity thus contributes to combined genetic and epigenetic disinhibition of *FKBP5* transcription in response to stress<sup>7, 8</sup>. This leads to much higher levels of *FKBP5* transcription after each stress exposure in this specific patient subset, hypothesised to cause a dysregulated cellular and systemic stress response that sets these individuals on a trajectory towards psychiatric illness later in life (Figure 1).

The extensive evidence of heightened *FKBP5* expression as a trans-diagnostic risk factor for

Matosin et al.

psychiatric disorders has spurred the development of small-molecule *FKBP5* antagonists as novel therapeutics<sup>3, 11</sup>. These agents have a promising profile of effects, with preclinical experiments in rodents showing that *FKBP5* antagonists improve stress-coping behaviour and reduce anxiety when given systemically or directly into relevant brain regions such as the amygdala<sup>11, 12</sup>. To move development of this drug-class forward, comprehensive characterisation of *FKBP5* directly in a large transdiagnostic brain sample is needed, as this is where psychiatric symptoms primarily manifest and therapeutics are most likely to exert their effects. This includes understanding of brain-expressed *FKBP5* across multiple regulatory levels (genetic variation, DNA methylation, transcript and protein) and its cell-type specificity.

In the largest and most comprehensive study to date, we examined an extensive collection (total N = 895) of human postmortem dorsolateral prefrontal cortex samples (Brodmann area 9; BA9) derived from individuals who lived with schizophrenia, major depression or bipolar disorder and controls. The dorsolateral prefrontal cortex is a brain area that is highly implicated in psychiatric disorders, associated with executive functioning and working memory processes, which are impaired by stress and hallmark symptoms of trans-diagnostic psychopathology<sup>13</sup>. We used bulk and single-cell omics approaches and advanced histological methods to explore the convergence of *FKBP5* haplotype, transcription, epigenetic regulation, translation, as well as the cell-type- and cortical-layer-specific patterns of expression. We found subtype-based expression differences with divergence at the age of 50, after which we observed marked increases in *FKBP5* expression, particularly in *FKBP5* risk haplotype carriers. We also showed that these effects converge specifically on excitatory pyramidal cells in the superficial cortical layers of BA9, and that heightened *FKBP5* in older subjects likely causes an increased neuroinflammatory and neurodegenerative profile in this patient subgroup. These results support the utility of *FKBP5* as a biomarker for a new, biologically-delineated psychiatric patient subgroup, and the development of *FKBP5* antagonists as a treatment option for these patients.

Matosin et al.

## RESULTS

### ***FKBP5* and *FKBP51* expression levels are significantly higher in cases compared to controls**

To comprehensively understand how expression patterns of *FKBP5* gex and *FKBP51* protein are altered in severe psychopathology, we used the largest sample to date to assess *FKBP5* cortical expression differences in cases compared to controls (see [Table 1](#) for explanation of postmortem cohort “Series” and sample sizes; analyses approaches detailed in the methods). Adjusting for age, we observed a striking increase (+28.05%) in *FKBP5* gene expression (gex) in all cases (Series 1:  $t=3.299$ ,  $P_{\text{NOM}}=0.001043$ ), driven mainly by +39.83% higher *FKBP5* gex in subjects with schizophrenia ( $t=3.226$ ,  $P_{\text{NOM}}=0.001403$ ) and depression (+23.86%;  $t=2.478$ ,  $P_{\text{NOM}}=0.01377$ ). In bipolar disorder, the effect size was in the same direction (+4.04%) but did not reach statistical significance likely due to a more limited sample size ( $t=1.241$ ,  $P_{\text{NOM}}=0.21578$ ; [Figure 2a](#)). We replicated this finding in an independent sample (Series 2,  $n=169$ , see [Table 1](#)), with an increase in *FKBP5* gex between cases vs controls ( $t=2.463$ ,  $P_{\text{NOM}}=0.0149$ , +2.5%) and schizophrenia subjects vs controls ( $t=2.600$ ,  $P_{\text{NOM}}=0.01058$ , +2.1%) ([Figure 2a](#)). *FKBP51* protein (Series 2) was also increased in schizophrenia cases vs controls ( $t=2.247$ ,  $P_{\text{NOM}}=0.0317$ , +9.74%). As for *FKBP5* gex, *FKBP51* protein levels were increased, although not significantly different, between depression and bipolar disorder subjects vs controls ([Figure 2a](#)). *FKBP5* and *FKBP51* levels in Series 2 were also strongly and positively correlated in all subjects ( $R=0.507$ ,  $P_{\text{NOM}}=4.57 \times 10^{-5}$ , [Figure 2b](#)). These results together indicate that *FKBP5* and *FKBP51* gex and protein levels are increased in psychiatric cases vs controls, with the largest effect sizes noted in schizophrenia subjects.

### ***FKBP5* and *FKBP51* expression levels increase with age in controls, with this aging-related increase exacerbated in psychiatric cases**

Of note, we observed a strong effect of age on *FKBP5* and *FKBP51* consistent with previous reports<sup>3, 4, 5</sup>. To further resolve aging effects on *FKBP5* and *FKBP51* expression, we firstly characterised the trajectory of *FKBP5* gex over the life-course in healthy control subjects in Series 1 ( $n=340$ ). Gex inflected in childhood and adolescence and increased consistently through adulthood (20-50 years;  $R=0.253$ ,  $P_{\text{NOM}}=0.0160$ ) and into older ages (50-96 years;  $R=0.334$ ,  $P_{\text{NOM}}=0.0097$ ; [Figure 2c](#)). The positive association of gex with age in controls in adulthood was also seen in Series 2 ([Supplementary Figure 1b](#);  $R=0.61343$ ,  $P_{\text{NOM}}=1.153 \times 10^{-7}$ ) and validated with qPCR using two probes targeting total *FKBP5* gex in Series 3 (Probe 1,  $R=0.460$ ,  $P_{\text{NOM}}=0.024$ ; Probe 2,  $R=0.449$ ,  $P_{\text{NOM}}=0.028$ ; [Supplementary Figure 1c](#)). *FKBP51* total protein expression was also positively correlated with age in adulthood (Series 3;  $R=0.500$ ,  $P_{\text{NOM}}=0.014$ ; [Figure 2d](#)).

We then assessed if the aging trajectory of *FKBP5* gex was heightened in cases vs controls (subjects >14 years). In Series 1, the aging trajectory of *FKBP5* gex was not different for all cases vs controls,

Matosin et al.

but the gex-aging slope was significantly heightened in schizophrenia subjects vs controls ( $P_{FDR}=0.0232$ ; [Figure 2e](#)). In particular, we noted +29.44% higher *FKBP5* gex in schizophrenia subjects over 50 ( $P_{NOM}=0.05$ ). The aging trajectory of total *FKBP5* gex in major depressive disorder was not different compared to controls after multiple correction ( $P_{FDR}=0.076$ ), but gex was heightened in subjects with major depression over 50 ( $P_{NOM}=0.038$ , +22.4%). There was no difference between bipolar disorder patients vs controls over 50 ( $P_{NOM}=0.808$ ). In Series 2, *FKBP5* was also positively and significantly associated with age in both cases (all grouped:  $R=0.4159$ ,  $P_{NOM}=9.242e-06$  and schizophrenia specifically:  $R=0.4817$ ,  $P_{NOM}=3.201e-05$ ) and controls ( $R=0.61343$ ,  $P_{NOM}=1.153e-07$ ). When comparing the *FKBP5* gex aging trajectories of cases vs controls, there was a borderline difference overall ( $P_{NOM}=0.056$ ) and none of the specific diagnoses vs control comparisons reached statistical significance. However, we again observed divergence in the gex and protein aging trajectories in cases (all grouped) compared to controls at approximately 50 years of age (gex: [Supplementary Figure 1b](#), protein: [Figure 2f](#)). These results consistently suggest that *FKBP5* mRNA and FKBP51 protein levels are heightened in older patients with schizophrenia and major depression compared to controls.

# **Combined effects of aging and *FKBP5* risk genotype increase *FKBP5* expression in psychiatric cases**

Previous studies indicate that *FKBP5* gex is differentially induced based on *FKBP5* rs1360780 genotype following stimulation by GR agonists, with minor allele (T) carriers exhibiting the highest levels of *FKBP5* gex after such stimulation<sup>14, 15</sup>. We tested for interactive effects of this genotype on *FKBP5* gex and case-status (all cases combined, sample sizes in [Supplementary Table 7](#)). We observed main effects of both case-status ( $B=0.0092$ ,  $t=2.277$ ,  $P=0.0233$ ) and the rs1360780 genotype ( $B=-0.0166$ ,  $t=-2.401$ ,  $P=0.0168$ ), but there was no significant interaction of case-status and genotype overall (genotype  $\times$  case-status:  $B=0.00699$ ,  $t=1.264$ ,  $P=0.2068$ ) on *FKBP5* gex levels. As the lack of a significant interaction effect between case-status and genotype could be due to a diluted effect when cross-comparing all four case-status/genotype groups (i.e., minor and major allele carriers), we also performed a direct comparison of case risk-allele T carriers compared to the other case-status/genotype groups. *FKBP5* gex was heightened in cases carrying the risk T-allele compared to control CC homozygotes (+44.7%,  $P_{FDR}=0.001195$ ) and control T carriers (+28%,  $P_{FDR}=0.01104$ ), but there was no difference compared to case CC homozygotes ([Figure 3a](#)).

Given the clear divergence of aging trajectories between case-control groups over 50 ([Figure 2e/f and 3b](#)) and the observed genotype effects, we further examined *FKBP5* gex between case-and-control genotype groups in subjects 50 to 75 years. In this age group, cases carrying the T allele had the highest level of *FKBP5* gex ( $P_{FDR}\leq 0.024$ , [Figure 3b](#)). Although in a modest sample size ( $n=38$  case and 24 control CC homozygotes, 72 case and 66 control T carriers), these findings suggest there are

Matosin et al.

effects of the *FKBP5* rs1360780 genotype on total *FKBP5* gex over aging, as well as case-status. Overall, these findings indicate convergence of aging and genotype effects on *FKBP5* that contribute to the heightened levels of expression observed in psychopathology.

### **Case-status, age and increased gene expression associate with lower *FKBP5* DNAm at key enhancer sites**

DNAm changes at key enhancer sites can lead to lasting and cumulative changes in gex<sup>16</sup>. Specifically, *FKBP5* DNAm associates with age in brain<sup>5</sup> and peripheral blood<sup>17</sup>. We therefore explored whether the observed case-control status, age and genotype-related differences in gex were associated with DNAm changes. We grouped CpGs functionally by (i) genomic position within the *FKBP5* locus, (ii) results of our previous targeted bisulfite sequencing of *FKBP5* DNAm in response to GR activation<sup>6</sup> and (iii) functional quantitative chromatin immunoprecipitation experiments<sup>18</sup>. Using data from the Illumina 450k DNA methylation arrays, the average percentage DNAm of CpGs was assessed for the distal topologically associating domain (TAD), a downstream conserved methylation quantitative trait locus (mQTL), the intron 5 GRE<sup>6</sup>, the transcription start site (TSS), the proximal enhancer GREs (grouped together as well as analysed as potentially independently functioning CpGs), and the proximal TAD ([Supplementary Table 8](#)).

We firstly identified single CpGs/regions where DNAm was associated with gex levels in Series 1 ([Supplementary Table 9](#)). A negative correlation between total *FKBP5* gex and DNAm was observed in the downstream conserved region ( $R=-0.102$ ,  $P_{\text{NOM}}=0.022$ ) and the proximal enhancer (total group:  $R=-0.1458$ ,  $P_{\text{NOM}}=0.0011$ ); specifically, we observed that lower DNAm in these regions was associated with higher gex ([Figure 3c and 3d](#)). Lower DNAm at the proximal enhancer was also observed in cases compared to controls, specifically at the cg25114611 CpG in the proximal enhancer ( $t=-3.251$ ,  $P_{\text{FDR}}=0.007$ ,  $-2.94\%$ ; [Supplementary Table 10](#)). This difference was mainly carried by the schizophrenia group compared to controls ( $P_{\text{FDR}}=0.004$ ,  $-4.44\%$ ; [Supplementary Figure 1d](#)). DNAm was also significantly correlated with age in a number of regions, including a strong negative correlation in the proximal enhancer (total,  $R=-0.788$ ,  $P_{\text{NOM}}=6.447\text{e-}106$ ; [Figure 3d](#) and [Supplementary Table 11](#)). However, there were no clear genotype effects on DNAm in any of the regions. Together, these results indicate that there is convergence of case-status and age on DNAm levels in the proximal enhancer of *FKBP5*. Specifically, lower DNAm was associated with case-status, age, and higher gene expression. This is in line with the significant negative correlation of DNAm in this enhancer and gex in the total sample.

***FKBP5* and *FKBP51* are prominently expressed in superficial-cortex excitatory neurons, and increased in cases compared to controls in these neurons**



Matosin et al.

We next aimed to gain deeper mechanistic insight into the cell-type contributions of heightened *FKBP5* in the human brain, by assessing *FKBP5* cell-type distribution, cortical-layer specificity and the cell-type specificity of aging effects in the BA9 brain area. Focusing on single-nucleus RNA sequencing (snRNAseq) data from Series 4, we examined differential *FKBP5* gex expression between cell types. Among the 26 delineated cell-type clusters in Series 4 (n=34), *FKBP5* gex was most highly expressed on microglia, astrocytes and excitatory neurons (Figure 4a), and statistically enriched in the microglia cluster ( $P_{\text{NOM}}=3.148\text{E-}145$ ;  $P_{\text{ADJ}}=9.4634\text{E-}141$ ). We also compared our results with similar recent human prefrontal cortex snRNAseq datasets<sup>19, 20, 21</sup>. In BA9 (n=3)<sup>20</sup>, expression was also highest in microglia and excitatory neurons (Figure 4a). In the adjacent BA6/BA10 areas (n=6)<sup>21</sup>, highest levels were observed in excitatory and inhibitory neurons (Figure 4a). In the two additional datasets, *FKBP5* expression was not significantly enriched in any of the cell-types, in line with the fact that *FKBP5* is expressed in different cell-types without necessarily defined cell-type identity. High expression in excitatory neurons was a consistent finding across the three datasets.

We subsequently performed triple-label fluorescent immunohistochemistry in Series 3 to examine *FKBP51* cellular distribution at the protein level. *FKBP51* was colocalised with neuronal marker NeuN, with strong staining present in the cytoplasm and moderate staining in the nucleus (Figure 4b). However, contrary to gex, we did not observe co-localisation of *FKBP51* with microglia (TMEM119) nor astrocytes (GFAP) using multiple validated *FKBP51* antibodies (Supplementary Table 5, Supplementary Figure 1a). There was no visible *FKBP51* staining in the white matter, suggesting *FKBP51* protein is lowly expressed in oligodendrocytes. These data suggest that at the protein level, *FKBP51* expression in BA9 is enriched in neuronal subtypes while RNA expression may also be present at detectable levels in microglia and astrocytes.

In the snRNAseq data from Series 4, we next assessed case-control differences of *FKBP5* gex within each of the 26 major cell-type clusters. We observed a marked increase in *FKBP5* gex in the excitatory neuron group in cases with depression compared to controls (+24.8%) after covarying for a strong effect of age ( $t=-2.327$ ,  $P_{\text{NOM}}=0.0267$ , effect of corrected age covariate:  $t=7.130$ ,  $P=5.18\text{e-}08$ ) (Figure 4c), although this did not survive correction for multiple cell-type comparisons ( $P_{\text{FDR}}=0.2548$ ; Supplementary Table 12). There were no significant depression/control differences between *FKBP5* gex in any other cell-type groups, including the microglia cluster ( $P_{\text{NOM}}>0.187$ ). To further narrow down which excitatory neurons contribute to increased *FKBP5* gex, we performed a subsequent analysis in 7 excitatory neuron sub-clusters. Our results showed 25% higher *FKBP5* gex in case vs controls, exclusively in the Ex 10 cluster representing excitatory neurons specifically from superficial cortical layers 2-4 ( $t=-2.190$ ,  $P_{\text{NOM}}=0.0364$ ), suggesting the increase in *FKBP5* gex in excitatory neurons is specific to neurons of the superficial cortical layers (Supplementary Table 12).



Matosin et al.

## Age influences *FKBP5* and *FKBP51* expression specifically in superficial-cortex excitatory neurons

We next examined aging effects of *FKBP5* gex cell-type specifically, by correlating *FKBP5* gex and age in all major cell-type clusters in Series 4 (Figure 5a, Supplementary Table 13). We observed a strong, positive association of *FKBP5* gex with aging in the excitatory neuron group ( $R=0.664$ ,  $P_{FDR}=1.31E-04$ ), with weaker effects surviving multiple correction observed in astrocyte and oligodendrocyte cell clusters ( $R=0.401$ ,  $P_{FDR}=0.048$  for both clusters) but no significant correlation with age in microglia. Further assessment of the excitatory neuron subclusters revealed that the aging effect was specific to, and strongest in, the superficial layer 2-4 excitatory neurons ( $R=0.700$ ,  $P_{FDR}=2.88E-05$ ).

Leveraging single-molecule fluorescent *in situ* hybridization with RNAscope assays, we quantified the aging-related changes of *FKBP5* in spatial context with increased accuracy (Series 3), assessing the association of *FKBP5* gex with age in the superficial (Layer II-III) versus the deep layers (V-VI) of the BA9 cortex (Figure 5b). Our results showed a positive correlation of *FKBP5* gex and age specific to the superficial layers of the cortex ( $R=0.427$ ,  $P_{NOM}=0.038$ ), but not the deep layers (Figure 5c). Similar to our immunohistochemistry assays, we did not observe *FKBP5* gex in the white matter. The superficial layers of the BA9 cortex consist of small, medium, large and super large pyramidal cells, whereas the deeper layers consist of fewer and smaller pyramidal cells and high density of glia (Figure 5b). These results thus consistently suggest that the disease and aging-related *FKBP5*/*FKBP51* increases we observed in the human BA9 cortex are pronounced in excitatory neuron subtypes, and especially those in the superficial cortical layers of BA9.

## *FKBP5* co-expression and pathway enrichment differs in younger vs older subjects

We next aimed to provide broader understanding of the cellular processes altered in association with increased *FKBP5* gex over the life-course. In Series 1, we separated all subjects into three age quantiles and performed gene co-expression analyses in association with *FKBP5* to compare gene sets between subjects in the 1<sup>st</sup> vs 3<sup>rd</sup> age quantile (1<sup>st</sup> quantile: mean 32.17 years, 3<sup>rd</sup> quantile: mean 54.67 years;  $n=72$  in each quantile). We confirmed that *FKBP5* gex was +47% higher in 3<sup>rd</sup> vs 1<sup>st</sup> age quantile (mean *FKBP5* gex 1<sup>st</sup> quantile = 1.079, mean *FKBP5* gex 3<sup>rd</sup> quantile = 2.042). In the 1<sup>st</sup> quantile, 1456 genes were co-expressed with *FKBP5*, while 480 genes were co-expressed with *FKBP5* in the 3<sup>rd</sup> quantile at FDR 5% (Figure 6a). 221 genes were co-expressed in both age groups, but the majority of genes were uniquely co-expressed in each age quantile. We used WebGestalt with these shared or uniquely expressed genes as input to perform functional gene ontology (GO) enrichment analyses (GO:Biological Process) of co-expression partners in each quantile to relate the genes co-expressed with *FKBP5* to biological functions (FDR 5% and >15 genes per pathway; Figure 6b).

Matosin et al.

Overall, genes and the corresponding pathways in the 1<sup>st</sup> quantile displayed independent relationships compared to genes uniquely co-expressed in the 3<sup>rd</sup> quantile, and the intersecting genes between the two quantiles appeared to be driven by age.

Of the shared genes co-expressed with *FKBP5* in both age quantiles, significantly enriched processes included positive regulation of cytokine production defence, defence response to other organisms, regulation of inflammatory response, positive regulation of defence response, positive regulation of secretion, and regulation of peptide secretion. The transcripts within these terms were positively correlated to *FKBP5* gex (75% to 100% of transcripts within pathway, [Figure 6c](#)). Of the transcripts uniquely co-expressed between the 1<sup>st</sup> and 3<sup>rd</sup> quantiles, we also saw that significantly enriched processes mainly included transcripts that had a positive correlation to *FKBP5* gex (1<sup>st</sup>: 76-100%, 3<sup>rd</sup>: 75-100% of transcripts within the pathway, [Figure 6c](#)), but the terms were distinct between the two age groups. In the 1<sup>st</sup> quantile, we saw enrichment of *FKBP5* co-expression with genes involved in terms relating to synaptic plasticity, including in neuron projection organisation and dendrite development, as well as regulation of vesicles and synaptic functions. The co-expression patterns in the third-age quantile were enriched in GO terms mainly related to various aspects of immune signalling and apoptosis. The vast majority of transcripts included in these processes were up-regulated (log2 FC > 0) in cases compared to controls ([Figure 6d](#)). These data indicate that there are distinct functional consequences of increased *FKBP5* gex depending on age and that transcripts co-expressed with *FKBP5* show differences in expression between cases and controls, most pronounced for co-expression in the older age group.

## DISCUSSION

This study describes the largest and most comprehensive study to date aimed at elucidating the factors that associate with *FKBP5* mRNA and FKBP51 protein expression in the human BA9 dorsolateral prefrontal cortex, and how *FKBP5* and FKBP51 is affected in severe psychiatric disorders. Our results demonstrate that case-status, age and genotype intersect to modulate the levels of *FKBP5* and FKBP51 expression in this brain area, and that this could be mediated by convergent epigenetic effects on functional upstream enhancers. *FKBP5* displays a distinct cell-type specific expression pattern, and effects of case- and age- status appear to be particularly pronounced in excitatory neurons of the superficial layers of BA9. Importantly, increased *FKBP5* expression associates with distinct pathways according to age, specifically synaptic plasticity pathways in early adulthood, and brain aging and neuroinflammatory pathways in subjects over 50 years. In addition, genes positively co-expressed in older individuals were also upregulated in cases compared to controls, suggesting that FKBP51 antagonists in older patients may have utility to attenuate brain aging and neuroinflammation. Together, these results indicate that the heightened *FKBP5* cortical expression observed in psychiatric patients accumulates over the life course to eventually cross a pathological threshold with widespread and broad physiological consequences that likely contributes to the pathobiology of psychiatric disorders, at least in a subset of patients. Our data indicate that the aging pattern of expression is exacerbated particularly in rs1360780 risk-allele carriers with schizophrenia and major depression at older ages, providing the first evidence that this specific subgroup of psychiatric patients (risk-allele carriers over 50 years of age) may benefit most from FKBP51-antagonist treatment.

Case-status and age both associate with lower DNAm within a proximal enhancer that contains a series of GREs<sup>6</sup> and for which lower DNAm correlates with higher *FKBP5* expression (see [Figure 3c](#) and [Figure 3d](#)). It has been shown that activation of the stress-hormone receptor via the synthetic agonist dexamethasone leads to reduced DNAm at this same enhancer in peripheral blood cells as well as a human hippocampal neuronal progenitor cell line<sup>6,22</sup>. Convergent associations of GR agonist treatment and exposure to childhood adversity on DNAm at the *FKBP5* locus have been reported in intronic GREs<sup>15</sup>. While it is plausible that stress and adversity, via activation of the stress hormone system, could also impact DNAm of this enhancer, this has not yet been explored in the context of childhood adversity. There could thus be convergence of environmental exposures and risk genotype on brain-expressed *FKBP5* via epigenetic effects on this enhancer, in line with more than 31 independent studies performed in over 31,000 individuals, consistently indicating that carriers of the *FKBP5* risk haplotype who are exposed to childhood adversity are at increased trans-diagnostic risk for developing severe psychopathology<sup>3</sup>. It is important to note that there may be effects of medication, especially antidepressants, in cases, given that reductions in blood *FKBP5* mRNA and

Matosin et al.

protein expression during antidepressant treatment has been reported<sup>23</sup>. Our finding is thus likely to be conservative, with unmedicated patients likely to show even more exacerbated effects.

Until now, *FKBP5*/*FKBP51* cell-type distribution and expression patterns in the human brain have been largely unknown. We show that *FKBP5* is most consistently expressed in excitatory neurons at the mRNA and protein levels, and that case-status (specifically depression) and age effects are most pronounced in excitatory pyramidal cells in the superficial cortical layers of BA9, although larger single-nucleus datasets with more power could reveal additional effects. While we also observed high expression in microglia in our BA9 single-nucleus RNA sequencing dataset, microglia-specific *FKBP5* expression was not different in cases vs controls and was not associated with age. *FKBP51* protein expression was also absent in microglia using two validated *FKBP51* antibodies. Of note, in total more microglia (and nuclei in total) were captured from cases compared to controls (480 vs 372 respectively<sup>24</sup>), which could contribute to the increased *FKBP5* gex observed overall given microglia appear to be high expressors of *FKBP5* mRNA. However, it is also possible that microglia-associated *FKBP5* expression may be reflective of increased microglia numbers which is suggested to occur in psychiatric disorders<sup>25</sup>, although a factor not explored in this study.

The alteration of *FKBP5* expression in excitatory neurons is of functional importance, given that knock-out of *Fkbp5* in mice has been shown to decrease long-term potentiation and increase presynaptic GABA release<sup>26</sup>. Transgenic mice overexpressing the human *FKBP51* display impaired long-term depression as well as spatial reversal learning and memory. This may be mediated via effects of *FKBP5* on chaperone-mediated recycling of  $\alpha$ -amino-3-hydroxy-5-methyl-4-isoxazolepropionic acid (AMPA)-receptors, with high *FKBP5* accelerating the rate of AMPA recycling and thus altering AMPA receptor trafficking<sup>27</sup>. Furthermore, increased *FKBP5* expression has been correlated with reduced mushroom and overall spine density<sup>28</sup>. This suggests that increased glucocorticoid-related *FKBP5* expression may in part also mediate the reported effects of glucocorticoids in the prefrontal cortex of rodents, the functional homologue to the dorsolateral prefrontal cortex of humans, where glucocorticoids have vast effects on working memory, memory consolidation and cognitive flexibility<sup>29,30</sup>. Impaired cognition is a transdiagnostic symptom frequent in all the investigated psychiatric disorders in this study, and often associated with a worse prognosis<sup>31</sup>. Targeting symptoms in the cognitive domain are thus of particular clinical interest.

We showed that the functional consequences of increased *FKBP5* varies across the lifespan, with heightened cortical-*FKBP5* in young adults associated with altered synaptic transmission, whereas in older individuals, heightened cortical-*FKBP5* was related to increased neuroinflammation and neurodegeneration. Possible impact of *FKBP5* on synaptic transmission in younger individuals is consistent with the neuronal expression pattern reported above as well as direct protein/protein

Matosin et al.

interaction partners and downstream targets of FKBP51 that have been shown to impact neuronal function. These include brain-derived neurotrophic factor (BDNF)<sup>32</sup>, glycogen synthase kinase 3 $\beta$  (GSK3 $\beta$ )<sup>33</sup>, calcineurin<sup>34, 35</sup>, synapsin<sup>36</sup>, protein kinase B/Akt<sup>37</sup> and AMPA receptors<sup>27</sup>. In older individuals, we observed co-expression of *FKBP5* with gene transcripts in pathways related to neuroinflammation and neurodegeneration. These effects again are likely mediated by direct or downstream targets of FKBP51. We have previously reported that increased FKBP51 contributes to a proinflammatory profile with increased age via activation of the alternative nuclear-factor $\kappa$ B (NF $\kappa$ B) pathway<sup>17</sup>. In addition, increased feedforward signalling related to the reported interactions of *FKBP5* with tau, the mammalian target of rapamycin (mTOR) and protein kinase B (Akt)<sup>5, 38, 39</sup>, may also contribute to these effects. Finally, FKBP51 has also been shown to play an important role in priming autophagy<sup>40, 41</sup>, in line with the co-expression of *FKBP5* with neurodegenerative pathways. Given that most of the co-expressed transcripts enriched in inflammatory and brain aging related pathways showed a positive correlation with *FKBP5* and were predominately upregulated in cases, older patients with heightened *FKBP5* expression may specifically benefit from treatments reducing FKBP51 activity.

Integrating multiple postmortem brain cohorts and analyses approaches, this study provides insight into brain *FKBP5*/FKBP51 expression in the human brain and its utility as a drug target and biomarker for a specific subtype of patients most likely benefiting from FKBP51-targeting treatment. Our data suggest that patients with severe psychiatric disorders, particularly those with schizophrenia and major depression over the age of 50 who carry the *FKBP5* risk haplotype, could represent a patient subgroup that are likely to benefit most from FKBP51 antagonists. These findings answer an international call for molecular psychiatry approaches that reclassify psychiatric diagnoses based on biology, rather than symptomatology<sup>1</sup>. Future brain studies that include environmental influences, particularly early life adversity, as well as the connection between *FKBP5* expression in the periphery and brain, are now needed.

Matosin et al.

## METHODS (3000/3000 words)

### 1. Human postmortem brain samples

*FKBP5* gex, DNAm and FKBP51 protein expression were examined in the dorsolateral prefrontal cortex (DLPFC; Brodmann Area 9, BA9) from 895 individuals across four postmortem brain cohorts (Table 1). Series 1 consisted of 668 subjects from the Lieber Institute for Brain Development Repository, with the study protocol approved by the NIMH/NIH Institutional Review Board (protocol 90-M-0142) and the National Institute of Child Health and Human Development Brain and Tissue Bank for Developmental Disorders (<http://www.BTBank.org/>) under contracts NO1-HD-4-3368 and NO1-HD-4-3383 approved by the Institutional Review Board of the University of Maryland. Subjects included a lifetime cohort of non-psychiatric controls (n=340), spanning in age from the prenatal second trimester to 85 years, and teenagers, adults, and 50+ year old subjects with schizophrenia (n=121), major depressive disorder (n=144) or bipolar disorder (n=63). Series 2 consisted of 169 adult subjects aged 18-87 years with schizophrenia (n=68), major depressive disorder (n=24), bipolar disorder (n=15) and matched controls (n=62). A subset of Series 2, consisting of 76 adult subjects with schizophrenia (n=20), major depression (n=20), bipolar disorder (n=16) or controls (n=20) was used specifically for protein analyses. These tissues were collected at the Victorian Institute of Forensic Medicine and obtained from the Victorian Brain Bank at the Florey Institute for Neuroscience and Mental Health, with approval from the Ethics Committee of the Victorian Institute of Forensic Medicine after gaining written consent from the nearest next of kin. This study was approved by the Human Ethics Committee of Melbourne Health. Series 3 consisted of adult control subjects aged 37-88 (n=24) with no history of psychiatric or neuropathological illness collected at the Neurobiobank at the Ludwig-Maximilians-University, with approval from the Ludwig-Maximilians-University ethics commission (#17-085). Series 4 consisted of 34 adult subjects with major depressive disorder (n=17) and matched controls (n=17) obtained from the Douglas–Bell Canada Brain Bank, approved by the Douglas Hospital Research Ethics Board with written informed consent from next of kin for each individual. Extensive details regarding cohort collection and tissue dissection methods for each series are included in the [Supplementary Materials and Supplementary Tables 1-4](#).

Matosin et al.

**Table 1.** Summary of cohorts, methods, and analyses conducted.

| Series                                                                                                         | Diagnosis (n)                                                    | n   | Age range (years) | Sex (M/F) | Method                                            | Analyses                                                                                                                                            |
|----------------------------------------------------------------------------------------------------------------|------------------------------------------------------------------|-----|-------------------|-----------|---------------------------------------------------|-----------------------------------------------------------------------------------------------------------------------------------------------------|
| <b>Series 1</b><br><i>Lieber Institute for Brain Development, USA</i>                                          | All Controls: lifetime sample, prenatal to adult                 | 340 | 14weeks-85        | 228/112   | Bulk RNA sequencing                               | Lifetime <i>FKBP5</i> gex (all controls)                                                                                                            |
|                                                                                                                | Case-control: Controls: subset of all control subjects >14 years | 179 | 14-85             | 137/42    |                                                   | Case-control differences in <i>FKBP5</i> gex                                                                                                        |
|                                                                                                                | Schizophrenia                                                    | 121 | 17-96             | 80/41     |                                                   | Case-control differences in <i>FKBP5</i> gex aging trajectories                                                                                     |
|                                                                                                                | Major Depression                                                 | 144 | 14-75             | 87/57     |                                                   |                                                                                                                                                     |
|                                                                                                                | Bipolar Disorder                                                 | 63  | 21-76             | 35/28     |                                                   |                                                                                                                                                     |
|                                                                                                                |                                                                  |     |                   |           | DNA methylation array                             | Case-control differences in <i>FKBP5</i> DNAm<br>Case-control differences in <i>FKBP5</i> DNAm aging trajectories                                   |
| <b>Series 2</b><br><i>Victorian Brain Bank at the Florey Institute for Neuroscience and Mental Health, AUS</i> | Controls                                                         | 62  | 22-80             | 49/13     | Exon array                                        | Case-control differences in <i>FKBP5</i> gex                                                                                                        |
|                                                                                                                | Schizophrenia                                                    | 68  | 18-82             | 54/14     |                                                   |                                                                                                                                                     |
|                                                                                                                | Major Depression                                                 | 24  | 19-87             | 12/12     |                                                   | Case-control differences in <i>FKBP5</i> gex aging trajectories                                                                                     |
|                                                                                                                | Bipolar Disorder                                                 | 15  | 31-79             | 7/8       |                                                   |                                                                                                                                                     |
|                                                                                                                | Controls                                                         | 20  | 32-80             | 11/9      | Immunoblot                                        | Case-control differences in FKBP51 protein                                                                                                          |
|                                                                                                                | Schizophrenia                                                    | 20  | 30-82             | 11/9      |                                                   |                                                                                                                                                     |
|                                                                                                                | Major Depression                                                 | 20  | 27-87             | 11/9      |                                                   | Case-control differences in FKBP51 protein aging trajectories                                                                                       |
|                                                                                                                | Bipolar Disorder                                                 | 16  | 31-79             | 8/8       |                                                   |                                                                                                                                                     |
|                                                                                                                |                                                                  |     |                   |           |                                                   | Correlation of <i>FKBP5</i> gex (exon array) and FKBP51 protein levels in the same subjects                                                         |
|                                                                                                                |                                                                  |     |                   |           |                                                   |                                                                                                                                                     |
| <b>Series 3</b><br><i>Neurobiobank at the Ludwig-Maximilians-University, GER</i>                               | Controls                                                         | 24  | 37-82             | 13/11     | Quantitative PCR                                  | <i>FKBP5</i> gex aging trajectory in controls                                                                                                       |
|                                                                                                                |                                                                  |     |                   |           | Immunoblot                                        | FKBP51 protein aging trajectories in controls                                                                                                       |
|                                                                                                                |                                                                  |     |                   |           |                                                   | Correlation of <i>FKBP5</i> gex (qPCR) and FKBP51 protein levels in the same subjects                                                               |
|                                                                                                                |                                                                  |     |                   |           | Single-molecular in-situ hybridisation (RNAscope) | Cortical layer specificity of <i>FKBP5</i> long- and short- variants<br>Layer-specific aging trajectories of <i>FKBP5</i> long- and short- variants |
|                                                                                                                |                                                                  |     |                   |           | Immunohistochemistry                              | <i>FKBP5</i> cellular and subcellular distribution across neurons, microglia and astrocytes in the grey matter                                      |
| <b>Series 4</b><br><i>Douglas-Bell Canada Brain Bank, CA</i>                                                   | Controls                                                         | 17  | 18-87             | 34/0      | Single-nucleus RNA sequencing                     | <i>FKBP5</i> specificity to distinct cell-type clusters                                                                                             |
|                                                                                                                | Major Depression                                                 | 17  | 19-82             |           |                                                   | Case-control differences in <i>FKBP5</i> gex across cell-type clusters                                                                              |

## Series 1

### 2. RNA sequencing

RNA sequencing methods have been previously described<sup>42</sup>. Briefly, total RNA from postmortem brain Series 1 was extracted using RNeasy Lipid Tissue Mini Kits (Qiagen, Germantown, MD, USA). RNA was then purified with RNeasy Mini Spin columns including on-column DNase digestion (Qiagen). Total RNA yield was determined with Qubit (ThermoFisher Scientific, Waltham, MA, USA) and RNA quality and RNA integrity assessed with the Agilent Bioanalyzer 2100 (Agilent



Matosin et al.

Technologies, Santa Clara CA USA). Poly-A containing RNA was purified from 1µg total RNA and mRNA molecules fragmented using divalent cations and heating. cDNA conversion was achieved with reverse transcriptase and random hexamers, and second-strand cDNA was synthesized with DNA polymerase I and RNase H. T4 DNA polymerase, T4 polynucleotide kinase (PNK0), and Klenow DNA polymerase were applied for end-repair. The addition of an 'A' base was achieved using Klenow Exo (3' to 5' exon minus) and ligation of Illumina P adapters to allow for pooling <8 samples in one flow cell. Purification and enrichment were then achieved by PCR to create the final cDNA library. High-throughput sequencing was performed on the HiSeq 2000 (Illumina, San Diego, CA, USA), with the Illumina Real Time Analysis module used for image analysis and base-calling and the BCL Converter (CASAVA v1.8.2) to generate FASTQ files with sequencing pair-end 100 bp reads.

Splice-read mapper TopHat (v2.0.4) was used to align reads to the human genome reference (UCSC hg19), with known transcripts provided by Ensembl Build GRCh37.67. Mapped reads covering the genomic region of *FKBP5* (chr6:35541362-35696397, GRCh37/hg19) were acquired. Reads covering each exon or unique exon-exon junction level were called using featureCounts (V1.5.0)<sup>43</sup>. Individual raw exon and junction reads were divided by the mapped total reads per subject. To remove residual confounding by RNA degradation, we used the quality surrogate variable analysis (qSVA) framework previously described<sup>44</sup>.

### 3. DNA methylation microarray

DNA methods have been previously described<sup>45</sup>. Briefly, genomic DNA from postmortem brain Series 1 was extracted from 100mg of pulverized DLPFC tissue using phenol-chloroform. 600ng of genomic DNA was bisulfite converted with the EZ-DNA methylation kit (Zymo Research, Irvine, CA, US). DNAm was assessed using the Illumina HumanMethylation450 BeadChip kit which covers >485,000 CpG dinucleotides (cg) covering 99% RefSeq gene promoters, including the *FKBP5* gene promoter. Arrays were run according to the manufacturer's protocols, with a percentage of the samples run in duplicate across multiple processing plates for assessing technical variability due to DNA extraction and bisulfite conversion. DNAm data was processed and normalized using Bioconductor's Minfi package in R<sup>46</sup>. Batch effects were corrected as previously described, with batch-derived principle components used as covariates<sup>45</sup>. Cell-type composition was also estimated for relative proportions of cell-types (neuronal and non-neuronal) using epigenome-wide DNA methylation data as previously described<sup>45</sup>.

### 4. SNP genotyping

Genomic DNA from postmortem brain Series 1 was extracted from 100mg of pulverized cerebellum tissue with the phenol-chloroform method. SNP genotyping was performed with the HumaHap650Y\_V3 or Human 1M-Duo\_V3 BeadChips (Illumina) according to manufacturer's

Matosin et al.

instruction as previously described<sup>42</sup>. The rs1360780 *FKBP5* single nucleotide polymorphism (SNP) was extracted from the dataset. This SNP has been shown to affect *FKBP5* chromatin shape and transcription<sup>15</sup>.

## 5. Statistical methods for case-control and aging analyses in Series 1

Analyses were performed in R v3.3.1 (<https://www.r-project.org>). Potential confounding factors (demographic and clinical variables) were screened using correlational analyses, and subsequently used as covariates or taken into account into residuals in the subsequent models. For gex and DNAm analyses, confounding factors included age (except for age-specific analyses), sex, race, and postmortem interval (PMI). For gex, qSVA principle component variables were also included as covariates to account for RNA degradation<sup>44</sup>. For DNAm, batch correction variables (for independent sample processing) and neuronal/non-neuronal cell-type estimations were additionally included. Case-control differences in gex and DNAm according to diagnosis and/or genotype were assessed using linear regressions including screened covariates. For gex analyses, unique exon-exon junction reads specific to all transcripts were assessed (35565181-35586872, hg38).

Gex and DNAm aging trajectories over the lifetime were analysed using logistic regression and Local Polynomial Regression (LOESS) fitted curves with the ggplot package in R. Gex and DNAm age trajectories were compared between diagnostic or genotype groups using the R package *sm* and the test for equality of non-parametric regression curves available in the *sm.ancova* command<sup>47, 48</sup>. As *sm.ancova* does not accept covariates, we calculated the residuals of a linear model with the screened covariates with these residuals then used as response values in *sm.ancova*. Logistic regressions and partial correlations accounting for screened covariates were used to determine correlational relationships between gex, DNAm, genotypes and age, with linear or non-parametric modelling dependent on which model could best explain data variability. Interaction analyses of genotype and cases-status were specifically analysed using the approach previously described<sup>49</sup>. For age analyses, post-hoc analyses were performed to confirm differences in age-trajectories at different ages with *lm* analyses, assessing case-control or genotype differences within individual age groups (teens, adults, 50+ age groups). Subjects 14-100 years were included in case-control analyses, given the youngest case (depression) was 14 years old. Ages were limited to 14-75 years when assessing genotype to ensure sufficient power, specifically with five subjects per diagnostic group and age range (teen, adult, 50+ age groups). Multiple-testing correction was applied using a FDR cut-off value of 0.05<sup>50</sup>, unless otherwise noted.

## 6. Gene co-expression and pathway analyses in Series 1

To find genes co-regulated with *FKBP5*, we regressed the gene expression levels of *FKBP5* against the expression of all other genes correcting for age, sex, race, PMI and PC1-PC7 (qSVAs). Multiple

Matosin et al.

comparisons correction was performed using the Benjamini–Hochberg procedure with a corrected false discovery rate (FDR) cut-off of 0.05. Using the set of FDR-corrected genes, gene ontology enrichment analysis was performed using the WEB-based GENE SeT AnaLysis Toolkit (<http://www.webgestalt.org/>) with "Biological Process noRedundant" set as the database and the set of 24,793 genes as background. GO terms with at least 15 genes and FDR < 0.05 were considered as significant.

## Series 2

### 7. Exon arrays

This method has been previously described<sup>51</sup>. Briefly, total RNA was isolated using TRIzol reagent (Life Technologies, Scoresby, VIC, Australia) and RNeasy mini kits (Qiagen, #74104, Chadstone Centre, VIC, Australia). RNA quality and quantity were assessed and samples with RINS of 7 or greater were deemed suitable for further analyses with the Affymetrix Human Exon 1.0 ST Array according to the manufacturer's instructions (Affymetrix, Santa Clara, CA, USA). After hybridisation, chips were scanned and the fluorescent signals converted into a DAT file for quality control, and CEL and CHP files were generated. Exon array data was used as a replication for the RNAseq gex analyses in Series 1 and followed the same statistical methods. For *FKBP5* gex measures, we analysed signal from *FKBP5* exon 5 (ENSE00000747342.1) which sits adjacent to the *FKBP5* exon-exon junction used to assess total *FKBP5* gex in Series 1.

### 8. Immunoblot (Series 2 and 3)

Relative protein densities of FKBP51 were determined by immunoblot in postmortem brain Series 2 and Series 3 as previously described<sup>52</sup>. 10mg of grey matter from each block was homogenised and protein concentration determined using BCA assays. For each sample, 12µg protein was denatured at 95°C in sample loading buffer consisting of Laemmli buffer and β-mercaptoethanol for 5mins. Duplicate samples were then loaded in a randomized order across four bis-tris polyacrylamide gels (4–20% Mini-PROTEAN TGX Precast 15-well Protein Gels, #4561096, BioRad, Hercules, CA, USA), at a loading concentration of 20µg of total protein per lane. Protein ladder (Precision Plus Protein Dual Colour Standard, BioRad) and a pooled sample (to account for gel-to-gel variability) were loaded onto each gel. Proteins were separated via electrophoresis with tris-glycine SDS buffer (BioRad) at 200V for 30mins. Separated proteins were transferred onto PVDF membrane (BioRad) at 100V at 4°C for 35min using Tris-glycine buffer (BioRad) containing 20% methanol. Transfer efficiency was confirmed using Ponceau S stain (Sigma-Aldrich), followed by washes in tris-buffered saline with Tween 20 (TBST). Membranes were blocked with 5% skim milk in TBST for 1hr at room temperature. Membranes were then incubated overnight at 4°C with selected primary antibody (Supplementary Table 5) diluted with TBST containing 1% skim milk. Primary antibody specificities were validated in FKBP51 knock out (KO) cells, generated from the SH-SY5Y human neuroblastoma

Matosin et al.

cell line using CRISPR-Cas9 (Supplementary Figure 1). Following primary incubation, blots were washed and incubated for 1hr at room temperature with horse-radish peroxidase-conjugated secondary antibody (anti-rabbit: 1:3000), washed and visualised using enhanced chemiluminescent detection. Band density was detected by the BioRad ChemiDoc XRS+ (Series 2) or the Amersham 6000 Gel Imager (GE Healthcare, Series 3) and quantified with Image Lab Software (BioRad). Membranes were re-probed a loading control (Series 2: anti- $\beta$ -actin polyclonal antibody Santa Cruz Biotechnology, Dallas, TX USA #sc-1616, 1:3000; Series 3: glyceraldehyde 3-phosphate dehydrogenase Abcam #ab9485, 1:2500). Densitometry values for each sample was normalised to the respective loading control, then to the respective pooled sample to account for gel-to-gel variability. Duplicates were averaged for each sample, and the mean of the two primary antibodies taken as the final values. Normalised protein levels were assessed for normal distribution and correlated with age and qPCR gex values using partial spearman correlations in R, as well as the *nlcor* package in R, a nonlinear correlation estimator<sup>53</sup>.

### Series 3

#### 9. Quantitative Real-Time PCR

mRNA levels of *FKBP5* transcripts in Series 3 were measured using qRT-PCR. 40mg of grey matter was dissected from each tissue block. RNA was extracted and RIN quantified as for RNA sequencing in Series 1. cDNA was synthesised from 500ng of RNA using the Maxima H Minus Reverse Transcriptase system (ThermoFisher Scientific). PCR conditions were set to 94°C for 5min, 40 cycles of 94°C for 30 s, 60°C for 30 s, 72°C for 30 s, and 72°C for 7min after the last cycle. Primer pairs were designed to amplify the unique junctions for total *FKBP5* gex (Supplementary Table 6), using customized TaqMan Gene Expression Assays (Applied Biosystems, Foster City, CA, USA) and the Lightcycler 480 (Roche, Basel, Switzerland). Gex levels of *FKBP5* was normalized to geometric means of the constitutively expressed genes  $\beta$ -actin (ACTB) and glyceraldehyde-3-phosphate dehydrogenase (GAPDH). Samples were measured in quadruplicate and averaged. Normalised mRNA levels were then checked for normal distribution and correlated with age using spearman correlations in R.

#### 10. Single-molecule fluorescent in situ hybridisation

To quantify the gex and examine cortical localisation of *FKBP5* alternative transcripts, single-molecule fluorescent in situ hybridisation was performed in Series 3 using the RNAscope Fluorescent V2 kit (Advanced Cell Diagnostics, Newark, CA, USA). The tissue preparation was conducted according to the manufacturer's instructions for the RNAscope® Part 1, Fresh Frozen Tissues protocol, with minor modifications for increased signal-to-noise ratio. Briefly, the 24 tissue blocks from Series 2 were cryosectioned at 16 $\mu$ m and mounted onto Superfrost Plus Gold slides. In situ hybridisation was performed in duplicate, using adjacent sections for each subject. Sections were post-

Matosin et al.

fixed with 4% PFA for 1 hr at 4°C and washed in wash buffer. Slices were permeabilised with hydrogen peroxide for 10min and digested with protease IV for 30min. The slices underwent the hybridisation procedures using the RNAscope® Multiplex Fluorescent Version 2 User Manual Part 2 (ACD), with wash steps increased to 3x between each hybridisation step and signal amplification to reduce background signal. We used two hybridisation probes customised to target either (1) *FKBP5* long transcripts (V1-3) in channel 2 at 1000-2041bp, or (2) *FKBP5* short transcript (V4) in channel 3 at 1475-2968bp. Total *FKBP5* gex was then calculated by summing the results of short and long probes together. Positive (POLR2A and PPIB) and negative (DapB) control probes were also included. TSA fluorophores for cyanine 3 and cyanine 5 (Perkin Elmer) were used at a concentration of 1:1000. Slides were counter-stained with DAPI. Lastly, autofluorescence eliminator reagent (Merck Millipore-2160) was applied to reduce fluorescence in the cyanine 3 channel (~570nm), generated by lipofuscin granules which accumulate in human cortex. Slides were mounted with Aqua-Poly/Mount medium.

Images were captured on the Leica SP8 confocal microscope. Specifically, consistent regions of interest were identified between subjects based on gyri formation, with the anterior most point of each section imaged. 11 z-stack images were taken at 0.5µm distance. The grey matter of BA9 can be characterised by 10 sub-layers containing different densities of cortical neurons and glia<sup>54</sup>. Separate images of the upper and lower layers of BA9 were thus taken based on visual nuclei morphology and density, and distance to the cortex edge (the dome, brink, wall or valley) or the white matter. The superficial image approximately represents layer II and III (external granular layers) and IV (internal granular layer) of BA9, capturing small, medium, large and super large pyramidal cells, while the deeper image approximately captures layers V (internal pyramidal layer) to VI (spindle cell layer), which contain fewer and smaller pyramidal cells, fusiform cells and higher density of glia<sup>55</sup>. *FKBP5* long transcript probes were detected with cyanine 3 at 570nm, and the short transcript in cyanine 5 at 650nm. Optimal exposure time and image processing procedures were determined using positive controls (POL2RA for the long transcripts and PPIB for the short transcript), which were undetectable in sections hybridised with the negative control probe DapB. All images were captured using these same parameters under 40X magnification. For analyses, Fiji software<sup>56</sup> was used to merge the 11 z-stacks into one image, adjust thresholds, and automatically quantify the number of nuclei and transcripts for each probe, with one dot representing one transcript. The number of transcript dots were normalised to the number of nuclei, and the average dots for each duplicate subject was calculated. Logistic regressions, spearman partial correlations and the *nlcor* package in R were used to assess the relationship between *FKBP5* gex with age.

## 11. Triple-label Fluorescent Immunohistochemistry

Matosin et al.

To quantify cellular and subcellular localisation of FKBP51 protein, triple-label immunohistochemistry was performed in postmortem brain Series 3. Fresh frozen tissue blocks were cryosectioned at 50µm, mounted onto Superfrost Plus Gold slides. Sections were post-fixed with 4% PFA and antigen retrieval was performed using 10mM citric acid buffer with 0.5% Tween-20 for 10mins. Tissue was permeabilised with 0.3% Triton X-100 in phosphate buffered saline (PBS) for 5mins and blocked with 10% normal serum, 1% bovine serum albumin, with 0.3M glycine in PBS at room temperature for 1hr. Tissue was then incubated overnight at 4°C in a primary antibody solution containing rabbit anti-FKBP51 (1:300, Cell Signalling, #8245S or 1:300, Santa Cruz Biotechnology, #D-4; antibodies validated: [Supplementary Figure 1](#)), neuronal marker (1:300 mouse anti-NeuN, Millipore MAB377), microglia marker (1:100, rabbit anti-TMEM119, Abcam #ab185333) and astrocyte marker (1:100, chicken anti-GFAP, Millipore AB5541). Following washing, appropriate secondary antibodies and DAPI were applied (anti-rabbit 488, anti-chicken 546, anti-mouse 647 at 1:150; DAPI at 1:5,000). Tissues were counterstained with autofluorescence eliminator reagent (Merck Millipore-2160) and cover-slipped with Aqua-Poly/Mount medium. Images were captured on the Leica SP8 confocal microscope at 40x magnification.

#### Series 4

#### 12. Single-nuclei RNA sequencing

We characterised the cell-type specificity of *FKBP5* gex in BA9 with single-nucleus RNA sequencing (snRNAseq) data from Series 4<sup>24</sup>. snRNAseq was performed using the 10X Genomics Chromium system (Version 2 chemistry). Data were processed with Cellranger and Seurat to identify cell-type clusters, and differential expression analysis was used for identifying genes enriched in specific major and sub-type cell clusters as previously described<sup>24</sup>. The FindAllMarkers function was used with the bimodal test and logfc.threshold of log(2), with other parameters set to default. *FKBP5* expression per single cell was extracted. All cells were scaled to 10,000 reads and then averaged per subject to create a pseudo cell per subject per classified cell-type in the dataset. *FKBP5* expression per cell-type was assessed for case-control differences accounting for age, PMI, RIN, pH and batch, by including these variables as covariates in linear regression modelling on transformed data to account for skewedness. The *FKBP5* aging trajectory per cell-type was assessed using spearman correlations. Note that excitatory neuron sub-clusters Ex 1, Ex 5 and Ex 9 were removed due to a large number of zero-expressors which skewed the data, and an inability to determine if these subjects were low expressors or technical dropouts.

#### Acknowledgements



Matosin et al.

We thank the families from the USA, Canada, Germany and Australia who donated brain tissues to this research. We specifically thank the Lieber and Maltz families for their contributions towards the Lieber Institute brain collection. The Douglas-Bell Canada Brain Bank is funded by the Réseau Québécois sur le suicide, le troubles de l'humeur et les troubles associés (FRQS) as well as by Healthy Brains for Healthy Lives (CFREF) and Brain Canada grants to Dr Turecki and Dr Mechawar. The Victorian Brain Bank tissue collection was supported by the National Health and Medical Research Council (NHMRC; Australia; grant number 566967) and the Cooperative Research Centre (CRC) for Mental Health and the Operational Infrastructure Support from the Victorian State Government. We would additionally like to thank Geoff Pavey for his efforts in curating the Australian Victorian Brain Bank and Madhara Udawela for supervising preparation of brain tissues in series 2. Dr Matosin was supported by an AI and Val Rosenstrauss Fellowship from the Rebecca L Cooper Medical Research Foundation, an NHMRC Early Career Fellowship (APP1105445), Alexander von Humboldt Foundation Research Fellowship, and International Brain Research Organisation (IBRO) Research Fellowship. Dr Matosin was also supported by grants from the Brain Behaviour Research Foundation (NARSAD Young Investigator Grant, #26486) and the Rebecca L. Cooper Medical Research Foundation (#PG2020645). Dr Arloth was supported by the Brain Behaviour Research Foundation (NARSAD Young Investigator Grant, #28063). Dr Mechawar's research is supported by grants from CIHR, HBHL and ERA-NET NEURON. Dr Gassen was supported by a grant from the Brain Behaviour Research Foundation (NARSAD Young Investigator Grant honoured by the P&S Fund #25348). Dr Binder is co-inventor on the following patent applications: FKBP5: a novel target for antidepressant therapy. European Patent# EP 1687443 B1; Polymorphisms in ABCB1 associated with a lack of clinical response to medicaments. United States Patent # 8030033; Means and methods for diagnosing predisposition for treatment emergent suicidal ideation (TESI). European application number: 08016477.5 International application number: PCT/EP2009/061575. Dr Falkai has been an honorary speaker for AstraZeneca, Bristol Myers Squibb, Eli Lilly, Essex, GE Healthcare, GlaxoSmithKline, Janssen Cilag, Lundbeck, Otsuka, Pfizer, Servier, and Takeda. During the past 5 years, but not presently, P. Falkai has been a member of the advisory boards of Janssen-Cilag, AstraZeneca, Eli Lilly, and Lundbeck. Dr Schmitt has been an honorary speaker for TAD Pharma and Roche and has been a member of advisory boards for Roche. The remaining authors declare no competing interests or conflicts of interest.

# **Author contributions**

N.Ma. and E.B.B. conceived, designed and managed the work, performed all initial analyses and drafted the manuscript. J.A., D.C., M.M., T.H., R.T. and A.E.J. were all involved in conceptualising and assisting with the statistical analyses. J.A., D.C., T.H. and C.C. were also involved in substantively drafting and revising the work. S.M., D.K., N.C.G., K.H. performed immunoblot and histological analyses, and assisted with interpretation of this data. N.S.M., K.W., G.R., C.N. were involved preparation of omics data for statistical analyses. E.S., T.A., P.F., J.E.K., D.R.W., N.Me., A.S., B.D., G.T., and T.M.H. were all involved in collection, dissection and curation of the brain samples used in this study, as well as managing the experiments and sharing the resulting datasets. All authors were involved in the acquisition, analysis and interpretation of the data, and approved the final version of the manuscript.



Matosin et al.

## References

1. Visscher PM, *et al.* 10 Years of GWAS Discovery: Biology, Function, and Translation. *Am J Hum Genet* **101**, 5-22 (2017).
2. Zannas AS, Wiechmann T, Gassen NC, Binder EB. Gene–Stress–Epigenetic Regulation of FKBP5: Clinical and Translational Implications. *Neuropsychopharmacology* **41**, 261-274 (2016).
3. Matosin N, Halldorsdottir T, Binder EB. Understanding the Molecular Mechanisms Underpinning Gene by Environment Interactions in Psychiatric Disorders: The FKBP5 Model. *Biol Psychiatry* **83**, 821-830 (2018).
4. Weickert CS, Webster MJ, Boerrieger D, Sinclair D. FKBP5 mRNA Increases after adolescence in human DLPFC. *Biological Psychiatry*, (2015).
5. Blair LJ, *et al.* Accelerated neurodegeneration through chaperone-mediated oligomerization of tau. *The Journal of clinical investigation* **123**, 4158-4169 (2013).
6. Wiechmann T, *et al.* Identification of dynamic glucocorticoid-induced methylation changes at the FKBP5 locus. *Clinical Epigenetics* **11**, 83 (2019).
7. Klengel T, *et al.* Allele-specific FKBP5 DNA demethylation mediates gene-childhood trauma interactions. *Nature neuroscience* **16**, 33-41 (2013).
8. Klengel T, Binder EB. FKBP5 allele-specific epigenetic modification in gene by environment interaction. *Neuropsychopharmacology* **40**, 244-246 (2015).
9. Kendler KS, Karkowski LM, Prescott CA. Causal relationship between stressful life events and the onset of major depression. *The American Journal of Psychiatry* **156**, 837-841 (1999).
10. Kendler KS, Myers JM, Keyes CLM. The Relationship Between the Genetic and Environmental Influences on Common Externalizing Psychopathology and Mental Wellbeing. *Twin Res Hum Genet* **14**, 516-523 (2011).
11. Gaali S, *et al.* Selective inhibitors of the FK506-binding protein 51 by induced fit. *Nature chemical biology* **11**, 33-37 (2015).
12. Hartmann J, *et al.* Pharmacological Inhibition of the Psychiatric Risk Factor FKBP51 Has Anxiolytic Properties. *J Neurosci* **35**, 9007-16 (2015).
13. Arnsten AFT. Stress signalling pathways that impair prefrontal cortex structure and function. *Nature Reviews Neuroscience* **10**, 410-422 (2009).
14. Menke A, *et al.* Genetic variation in FKBP5 associated with the extent of stress hormone dysregulation in major depression. *Genes Brain Behav* **12**, 289-296 (2013).
15. Klengel T, Binder EB. Allele-specific epigenetic modification: a molecular mechanism for gene-environment interactions in stress-related psychiatric disorders? *Epigenomics* **5**, 109-112 (2013).
16. Moore LD, Le T, Fan G. DNA methylation and its basic function. *Neuropsychopharmacology* **38**, 23-38 (2013).

Matosin et al.

17. Zannas AS, *et al.* Epigenetic upregulation of FKBP5 by aging and stress contributes to NF-kappaB-driven inflammation and cardiovascular risk. *Proc Natl Acad Sci U S A* **116**, 11370-11379 (2019).
18. Paakinaho V, Makkonen H, Jaaskelainen T, Palvimö JJ. Glucocorticoid receptor activates poised FKBP51 locus through long-distance interactions. *Molecular endocrinology (Baltimore, Md)* **24**, 511-525 (2010).
19. Lake BB, *et al.* Neuronal subtypes and diversity revealed by single-nucleus RNA sequencing of the human brain. *Science* **352**, 1586-1590 (2016).
20. Habib N, *et al.* Massively parallel single-nucleus RNA-seq with DroNc-seq. *Nat Methods* **14**, 955-958 (2017).
21. Lake BB, *et al.* Integrative single-cell analysis of transcriptional and epigenetic states in the human adult brain. *Nat Biotechnol* **36**, 70-80 (2018).
22. Provençal N, *et al.* Glucocorticoid exposure during hippocampal neurogenesis primes future stress response by inducing changes in DNA methylation. *Proc Natl Acad Sci U S A* **117**, 23280-23285 (2020).
23. Ising M, *et al.* FKBP5 Gene Expression Predicts Antidepressant Treatment Outcome in Depression. *Int J Mol Sci* **20**, 485 (2019).
24. Nagy C, *et al.* Single-nucleus transcriptomics of the prefrontal cortex in major depressive disorder implicates oligodendrocyte precursor cells and excitatory neurons. *Nature Neuroscience* **23**, 771-781 (2020).
25. Kaul D, Schwab S, Mechawar N, Matosin N. How Stress Physically Re-shapes the Brain: Impact on Brain Cell Shapes, Numbers and Connections in Psychiatric Disorders. *PsyArXiv* <https://doi.org/10.31234/osf.io/f3nj8>, (2019).
26. Qiu B, *et al.* Loss of FKBP5 Affects Neuron Synaptic Plasticity: An Electrophysiology Insight. *Neuroscience* **402**, 23-36 (2019).
27. Blair LJ, *et al.* The Disease-Associated Chaperone FKBP51 Impairs Cognitive Function by Accelerating AMPA Receptor Recycling. *eNeuro* **6**, ENEURO.0242-0218.2019 (2019).
28. Young KA, Thompson PM, Cruz DA, Williamson DE, Selemon LD. BA11 FKBP5 expression levels correlate with dendritic spine density in postmortem PTSD and controls. *Neurobiology of stress* **2**, 67-72 (2015).
29. Barseganyan A, Mackenzie SM, Kurose BD, McGaugh JL, Roozendaal B. Glucocorticoids in the prefrontal cortex enhance memory consolidation and impair working memory by a common neural mechanism. *Proc Natl Acad Sci U S A* **107**, 16655-16660 (2010).
30. Myers B, McKlveen JM, Herman JP. Glucocorticoid actions on synapses, circuits, and behavior: implications for the energetics of stress. *Front Neuroendocrinol* **35**, 180-196 (2014).
31. McTeague LM, Goodkind MS, Etkin A. Transdiagnostic impairment of cognitive control in mental illness. *J Psychiatr Res* **83**, 37-46 (2016).
32. Anderzhanova E, *et al.* The stress susceptibility factor FKBP51 controls S-ketamine-evoked release of mBDNF in the prefrontal cortex of mice. *Neurobiol Stress* **13**, 100239 (2020).

Matosin et al.

33. Gassen NC, *et al.* FKBP51 inhibits GSK3 $\beta$  and augments the effects of distinct psychotropic medications. *Mol Psychiatry* **21**, 277-289 (2016).
34. Baughman G, Wiederrecht GJ, Campbell NF, Martin MM, Bourgeois S. FKBP51, a novel T-cell-specific immunophilin capable of calcineurin inhibition. *Molecular and cellular biology* **15**, 4395-4402 (1995).
35. Weiwad M, *et al.* Comparative Analysis of Calcineurin Inhibition by Complexes of Immunosuppressive Drugs with Human FK506 Binding Proteins. *Biochemistry* **45**, 15776-84 (2006).
36. Schmidt U, *et al.* A role for synapsin in FKBP51 modulation of stress responsiveness: Convergent evidence from animal and human studies. *Psychoneuroendocrinology* **52**, 43-58 (2015).
37. Fabian A-K, März A, Neimanis S, Biondi RM, Kozany C, Hausch F. InterAKTions with FKBP51 - Mutational and Pharmacological Exploration. *PLOS ONE* **8**, e57508 (2013).
38. Balsevich G, *et al.* Stress-responsive FKBP51 regulates AKT2-AS160 signaling and metabolic function. *Nat Commun* **8**(1):1725. (2017)
39. Gassen NC, *et al.* Chaperoning epigenetics: FKBP51 decreases the activity of DNMT1 and mediates epigenetic effects of the antidepressant paroxetine. *Sci Signal* **8**, ra119-ra119 (2015).
40. Rein T. FK506 binding protein 51 integrates pathways of adaptation: FKBP51 shapes the reactivity to environmental change. *Bioessays* **38**, 894-902 (2016).
41. Gassen NC, *et al.* Association of FKBP51 with priming of autophagy pathways and mediation of antidepressant treatment response: evidence in cells, mice, and humans. *PLoS Med* **11**, e1001755 (2014).
42. Tao R, *et al.* GAD1 alternative transcripts and DNA methylation in human prefrontal cortex and hippocampus in brain development, schizophrenia. *Mol Psychiatry* **23**, 1469-1505 (2018).
43. Liao Y, Smyth GK, Shi W. featureCounts: an efficient general purpose program for assigning sequence reads to genomic features. *Bioinformatics* **30**, 923-930 (2013).
44. Jaffe AE, *et al.* qSVA framework for RNA quality correction in differential expression analysis. *Proc Natl Acad Sci U S A* **114**, 7130-7135 (2017).
45. Jaffe AE, *et al.* Mapping DNA methylation across development, genotype and schizophrenia in the human frontal cortex. *Nature Neuroscience* **19**, 40-47 (2016).
46. Aryee MJ, *et al.* Minfi: a flexible and comprehensive Bioconductor package for the analysis of Infinium DNA methylation microarrays. *Bioinformatics* **30**, 1363-9(2014).
47. Bowman A, Azzalini A. *Applied smoothing techniques for data analysis: the kernel approach with S-Plus illustrations* (1997).
48. Young SG, Bowman AW. Non-Parametric Analysis of Covariance. *Biometrics* **51**, 920-931 (1995).
49. Kraft P, Aschard H. Finding the missing gene-environment interactions. *Eur J Epidemiol* **30**, 353-355 (2015).

Matosin et al.

50. Benjamini Y, Hochberg Y. Controlling the False Discovery Rate: A Practical and Powerful Approach to Multiple Testing. *Journal of the Royal Statistical Society Series B (Methodological)* **57**, 289-300 (1995).
51. Scarr E, Udawela M, Thomas EA, Dean B. Changed gene expression in subjects with schizophrenia and low cortical muscarinic M1 receptors predicts disrupted upstream pathways interacting with that receptor. *Mol Psychiatry* **23**, 295-303 (2018).
52. Matosin N, *et al.* Alterations of mGluR5 and its endogenous regulators Norbin, Tamalin and Preso1 in schizophrenia: towards a model of mGluR5 dysregulation. *Acta Neuropathol* **130**, 119-129 (2015).
53. Ranjan C, Najari Sisi V. *nlcor: Nonlinear Correlation* (2019).
54. Economo Cv, Koskinas G, Triarhou L. *Atlas of cytoarchitectonics of the adult human cerebral cortex*, Illustrated edn. Karger (2008).
55. von Economo C. The Cytoarchitectonics of the Human Cerebral Cortex. *J Anat* **63**, 389 (1929).
56. Schindelin J, *et al.* Fiji: an open-source platform for biological-image analysis. *Nat Methods* **9**, 676-682 (2012).

# Figures

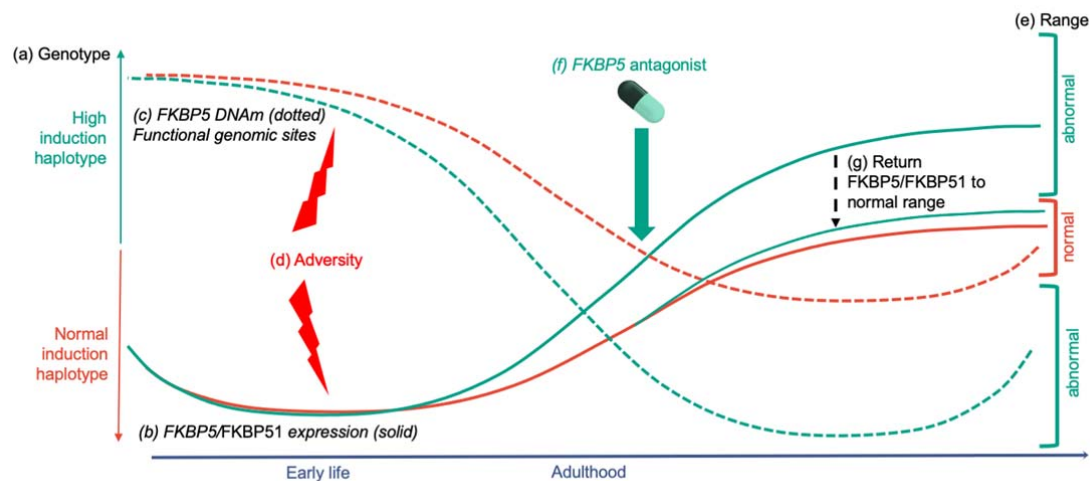

**Figure 1. Hypothesised model of FKBP5/FKBP51 expression and DNAm aging trajectories over the life course, and how these are influenced by genes and environment to contribute to the development of psychopathology later in life.** Extensive data from human genetic, animal and epidemiological studies indicates that carriers of the *FKBP5* high induction haplotype (a) have increased *FKBP5*/*FKBP51* expression (b) over the life-course. This is likely to be related to changes in DNAm at functional genomic sites of the *FKBP5* gene (c), which occurs in patients exposed to early life adversity (d). The combined genetic and epigenetic disinhibition of *FKBP5* is hypothesised to cause heightened expression patterns over the life course (teal compared to red curves). This heightened aging trajectory is hypothesised to enter an abnormal range (e) to contribute to a dysregulated stress response and increased risk to psychopathology later in life. It is proposed that treatment with *FKBP51* antagonists, especially during critical life-stages such as that indicated (f), is a promising therapeutic approach to correcting heightened *FKBP5* expression levels to prevent the development of psychopathology, or treat symptoms, in a patient subset (g): specifically carriers of the high induction *FKBP5* haplotype who are exposed to early life adversity.

Matosin et al.

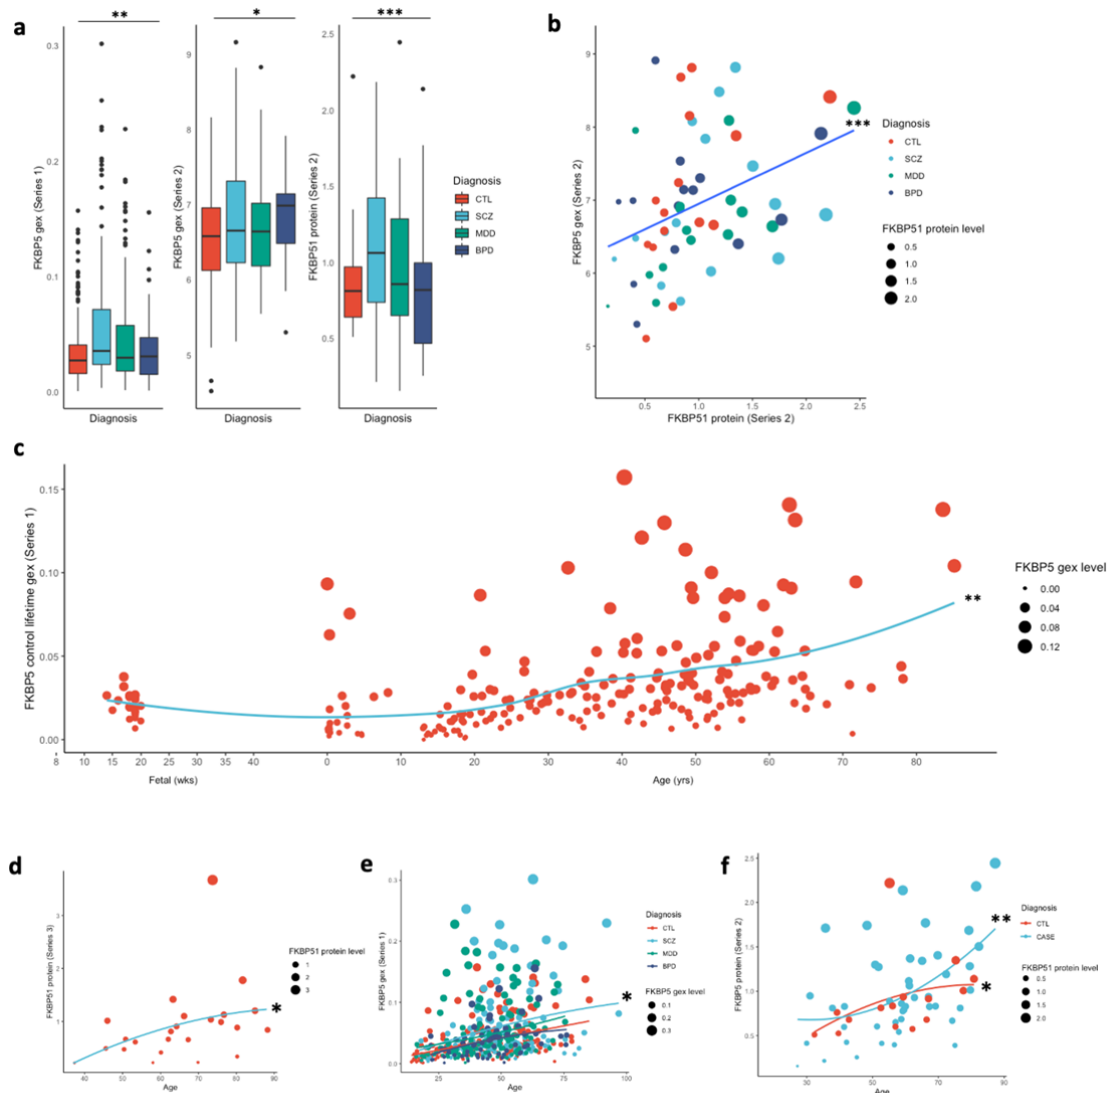

**Figure 2. Case-control differences in FKBP5 gene expression, and FKBP51 protein, and effects of age.** (a) FKBP5 gene expression was increased in all cases (grouped) compared to controls in Series 1 (left) and Series 2 (middle). The same pattern of expression was seen at the protein level in Series 2 (right). Significance bars compare all cases compared to controls. (b) FKBP5 gene expression and FKBP51 protein were strongly and positively correlated in all subjects in Series 2. (c) Lifetime trajectory of FKBP5 gene expression in control subjects Series 1, spanning from foetal time points to almost 90 years of age. FKBP5 gene expression steadily increases over the life course in healthy subjects. (d) FKBP51 protein expression increases over adulthood in healthy control subjects from Series 3. (e) FKBP5 gene expression positively correlates with age in cases compared to controls in Series 1, and expression is significantly heightened in schizophrenia and depression compared to controls. (f) FKBP51 protein expression in Series 2 is significantly heightened in cases compared to controls over aging. Comparison of individual diagnostic groups (schizophrenia, major depression and bipolar disorder vs controls) were not included due to limited power. Abbreviations: BPD, bipolar disorder; CTL, control; gex, gene expression; MDD, major depressive disorder; SCZ, schizophrenia; Series refer to the cohorts used for each analyses, as detailed in Table 1. Asterisk indicate significance levels: \*P<0.05, \*\*P<0.01, \*\*\*P<0.001.



Matosin et al.

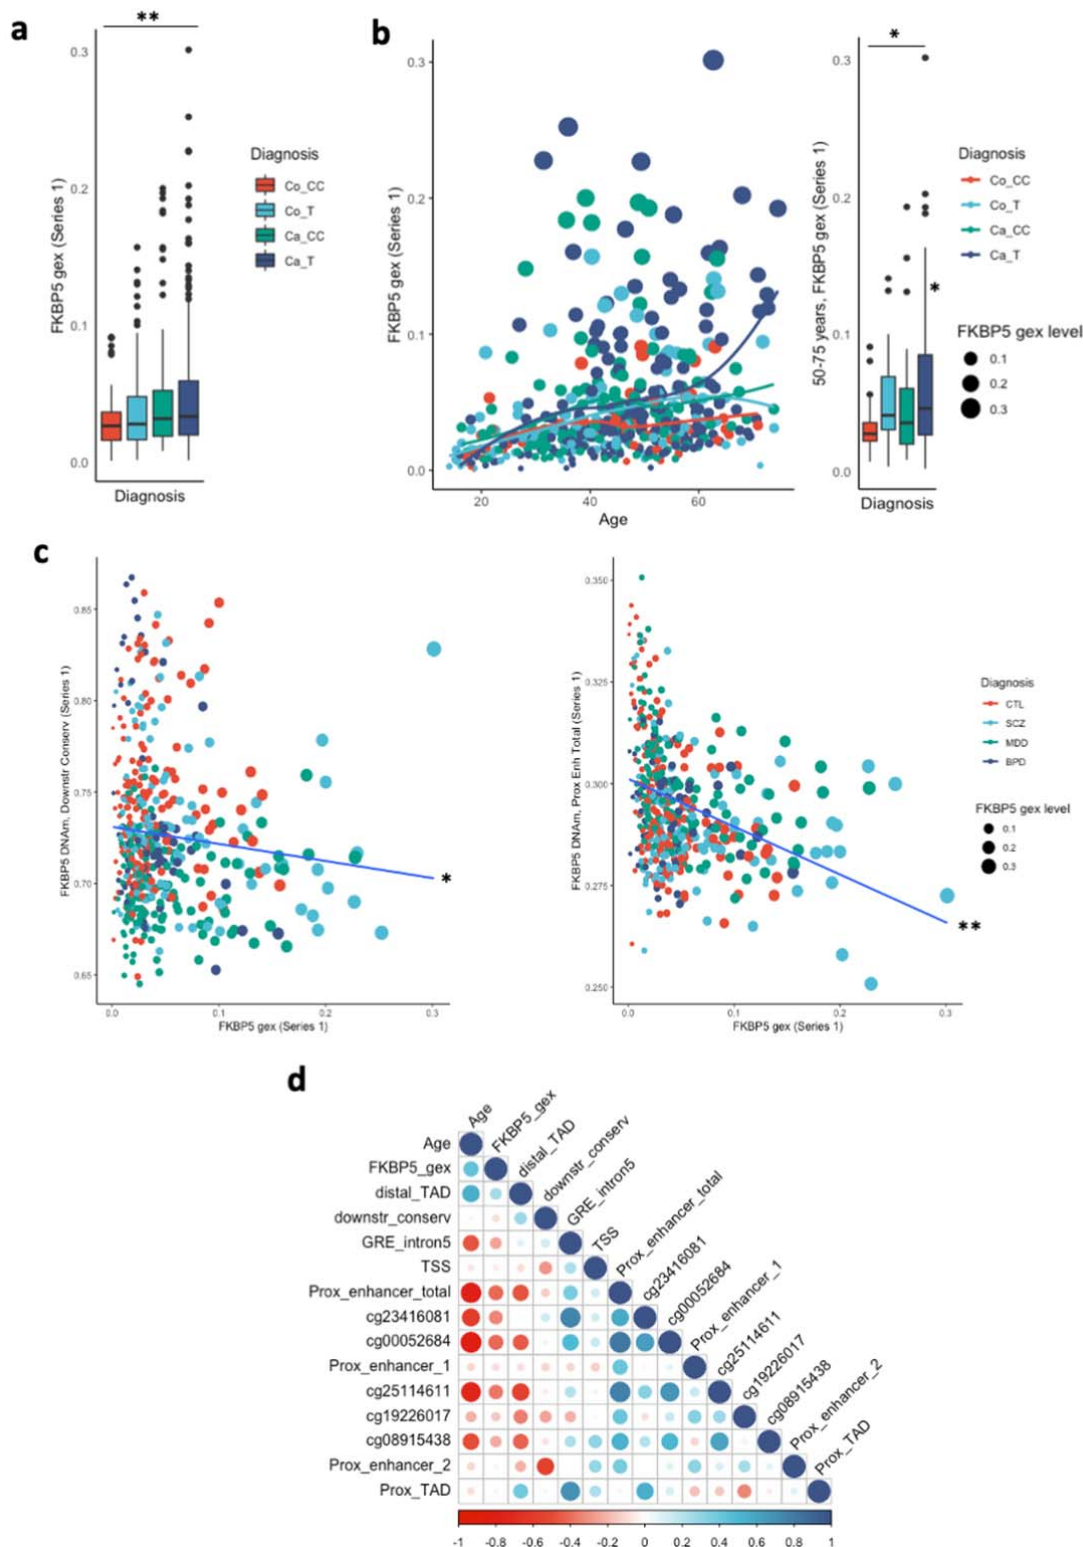

**Figure 3. Effects of genotype and age on FKBP5 expression and DNA methylation.**

(a) Effects of the *FKBP5* risk haplotype (tagged by the rs1360780 T allele) on gene expression. Case T carriers displayed significantly higher gene expression levels compared to control CC homozygotes and control T carriers, but not case CC homozygotes. (b) The aging trajectory of *FKBP5* gene



Matosin et al.

expression was significantly different between genotype groups, with increased expression in case T allele carriers compared to control CC homozygotes (scatterplot). This was specifically due to increased gene expression in case T allele carriers compared to control CC homozygotes at ages 50-75 years (boxplot). **(c)** Relationships between *FKBP5* DNA methylation and gene expression in Series 1. *FKBP5* DNA methylation in the downstream conserved region and the proximal enhancer (total) were negatively associated with gene expression. **(d)** Corrplot summarising correlations of age, *FKBP5* total gene expression and DNA methylation (CpG groupings as per Supplementary Table 8) in Series 1 across all subjects aged 14-75 years old. *Abbreviations:* BPD, bipolar disorder; CTL, control; Ca\_CC, case CC genotype carriers; Ca\_T, case T allele carriers; Co\_CC, control CC genotype carriers; Ca\_T, case T allele carriers; distal TAD, distal topologically associated domain; DNAm, DNA methylation; Downstr Cons, downstream conserved region; gex, gene expression; MDD, major depressive disorder; GRE, glucocorticoid response element; SCZ, schizophrenia; TSS, transcription start site; Prox Enh Tot, total DNAm across the total proximal enhancer region; Prox TAD, proximal topologically associated domain. Series refer to the cohorts used for each analyses, as detailed in Table 1. Asterix indicate significance levels: \*P<0.05, \*\*P<0.01, \*\*\*P<0.001.

Matosin et al.

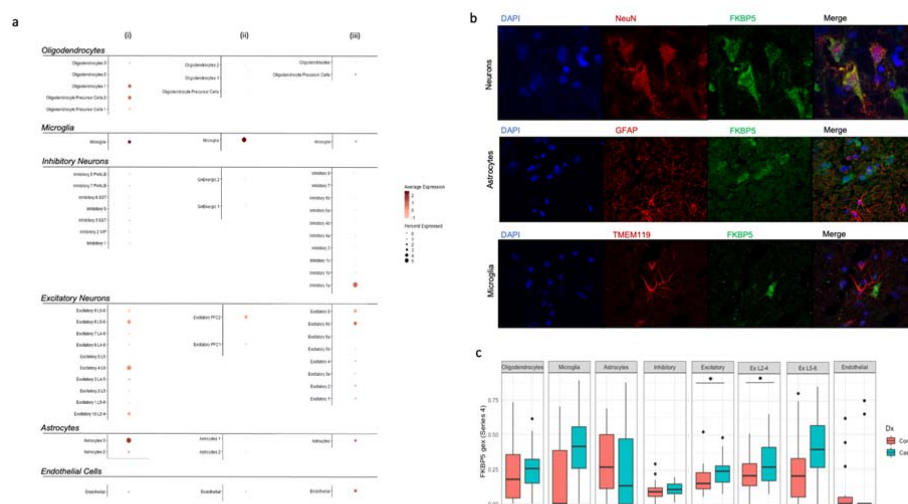

**Figure 4. Cell-type specificity and distribution of FKBP5/FKBP51 expression in BA9.** (a) Dot plots indicating average expression of FKBP5 in cell-type clusters derived from single-cell RNA-sequencing data across three cohorts: (i) Series 4, (ii) Habib et al., (iii) Lake et al. FKBP5 expression was visually enriched on microglia in cohorts (i) and (ii), and astrocytes in cohorts (i) and (iii). FKBP5 mRNA was consistently expressed on excitatory neuron subtypes across all three cohorts. (b) Triple-label immunohistochemistry of FKBP51 protein in Series 3. FKBP51 was colocalised with NeuN (neuronal marker), but not GFAP (astrocytes) or TMEM119 (microglia). (c) Cell-type specific differences in FKBP5 gene expression in cases vs controls in Series 4. FKBP5 expression was significantly higher in cases (all cases of depression) vs controls in the excitatory neuron cluster, specifically due to increased levels of expression in excitatory neurons from the superficial cortical layer (layer 2-4). Asterix indicate significance levels: \*P<0.05. Abbreviations: gex, gene expression; Ex, excitatory.

Matosin et al.

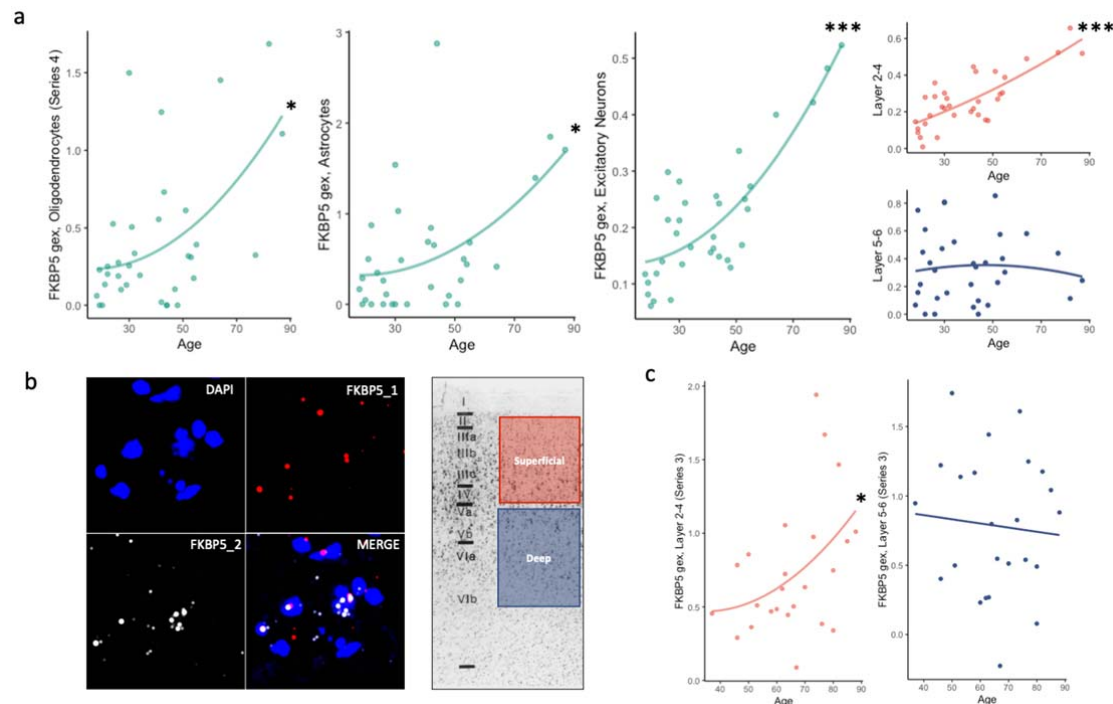

**Figure 5. Cell-type distribution of FKBP5, and cell-type effects of aging on FKBP5.** (a) FKBP5 was positively correlated with age in oligodendrocytes, astrocytes and excitatory neurons in Series 4. The association in the excitatory neuron cluster was due to a strong correlation specifically in excitatory neurons from the superficial (layer 2-4), but not deep (layers 5-6), cortical layers. (b) Representative images from single-molecule in-situ hybridisation experiments examining FKBP5 expression (sum of two probes, FKBP5\_1 and FKBP5\_2) in the superficial (layers 2-4) vs deep cortical layers (layers 5-6) in Series 3. (c) Correlation results of FKBP5 expression with age, quantified from single-molecule in-situ hybridisation experiments in Series 3. FKBP5 was significantly and positively correlated with age in the superficial, but not the deep cortical layers.



## SUPPLEMENTARY MATERIALS

### Contents

#### A. Supplementary Methods

1. Dissection protocols, clinical and demographic details for postmortem cohorts
  - a. Supplementary Table 1: Demographics of the LIBD lifetime cohort
  - b. Supplementary Table 2: Demographics of the Victorian Brain Bank cohort
  - c. Supplementary Table 3: Demographics from the Munich Brain Bank cohort
  - d. Supplementary Table 4: Demographics from the Douglas-Bell Canada Brain Bank cohort
2. Antibody validation experiments
  - a. Supplementary Table 5: FKBP51 antibodies validated in FKBP51 knock-out cells
3. Primer design for real-time quantitative PCR experiments
  - a. Supplementary Table 6: RT-qPCR primer design

#### B. Supplementary Results

4. Supplementary Table 7: Sample sizes for genotype analyses
5. Supplementary Table 8: Functional groupings of *FKBP5* CpGs
6. Supplementary Table 9: Partial correlation of DNAm vs gex in each functional group and potentially independently functioning CpGs
7. Supplementary Table 10: Case-control differences in DNAm between *FKBP5* functional CpG groups
8. Supplementary Table 11: Partial spearman correlations of DNAm in each individual CpG/functional region with age, in the total cohort, ages 14 to 75 years
9. Supplementary Table 12: Case-control differences in *FKBP5* gex between excitatory neuron sub-clusters from Series 4 using linear regression modelling
10. Supplementary Table 13: Results of Spearman correlations assessing the relationship between *FKBP5* gex with age in each cell cluster from Series 4

#### C. Supplementary Figure

11. Supplementary Figure 1: validation of FKBP51 antibodies, association of FKBP5 gene expression with age in Series 2, quantitative PCR experiment results from Series 3, and DNA methylation differences from Series 1.

#### D. References

---

## A. SUPPLEMENTARY METHODS

### 1. Dissection protocols, clinical and demographic details for postmortem cohorts

#### *Postmortem brain Series 1*

The LIBD cohort (Series 1; Supplementary Table 1a) consisted of 252 control subjects ranging from neonate, infant, child, adolescent and adult age-groups, and 184 schizophrenia (SZ) subjects, 69 bipolar disorder (BPD) and 152 major depressive disorder (MDD) cases. Brains from Series 1 were collected at the Clinical Brain Disorders Branch (CBDB), the US National Institute of Mental Health (NIMH), the Northern Virginia and the District of Columbia Medical Examiner's Office (informed consent obtained from legal next of kin for all cases; NIMH Protocol 90-M-0142). Additional fetal, child, and adolescent brain samples were obtained through the National Institute of Child Health and Human Development Brain and Tissue Bank for Developmental Disorders (N01-HD-4-3368 and N01-HD-4\_3383). Briefly, DLPFC grey matter from fetal cases was extracted using a dental drill from hemisected 1-1.5cm coronal slabs. For non-fetal cases, Brodmann area 9 and 46 were dissected from the middle frontal gyrus immediately anterior to the genu of the corpus callosum. Dissected tissues

Matosin et al.

were pulverized and stored at -80°C. Detailed information about brain tissue collection and retrieval are available elsewhere (Tao et al., 2017).

**Supplementary Table 1.** Demographics of the LIBD lifetime cohort

| Descriptive                             | Group; mean (range)*            |               |               |               |
|-----------------------------------------|---------------------------------|---------------|---------------|---------------|
|                                         | CTRL                            | MDD           | BD            | SCZ           |
| Subjects                                | 340                             | 132           | 59            | 102           |
| Age at death, yr                        | 30.12 (14 weeks prenatal to 85) | 43.7 (21-64)  | 43.7 (21-65)  | 46.0 (20-62)  |
| Sex, male:female                        | 228:112                         | 79:53         | 32:27         | 69:33         |
| PMI, h                                  | 24.79 (1-90)                    | 36.4 (5-160)  | 29.5 (5-65)   | 39.0 (7-142)  |
| pH                                      | 5.72 (5.9-7.1)                  | 6.4 (5.9-7.3) | 6.3 (5.9-6.9) | 6.4 (5.9-7.0) |
| RIN                                     | 8.4 (5-10)                      | 8.0 (5.1-9.5) | 7.8 (5.0-9.3) | 8.0 (5.4-9.4) |
| Cause of Death <sup>†</sup> , 1:2:3:4:5 | 2:53:186:0:37                   | 2:20:28:79:1  | 2:7:11:39:0   | 3:15:64:20:0  |
| Ethnicity <sup>‡</sup> , 1:2:3:4        | 145:177:9:9                     | 116:11:3:2    | 49:5:2:3      | 55:42:2:3     |

**Abbreviations:** CTRL, control; MDD, major depressive disorder; BPD, bipolar disorder; SCZ, schizophrenia; PMI, postmortem interval; RIN, RNA integrity number. \*Unless otherwise indicated. <sup>†</sup> 1 = Undetermined, 2 = Accident, 3 = Natural, 4 = Suicide, 5 = Homicide. <sup>‡</sup> 1 = Caucasian, 2 = African American, 3 = Hispanic, 4 = Asian.

### Postmortem brain Series 2

The Victorian brain bank cohort (Series 2; Table 1c) consists of 20 schizophrenia, 20 major depression and 16 bipolar subjects, as well as 20 matched controls. The Diagnostic Instrument for Brain Studies was used to conduct case history reviews to reach a diagnostic consensus using the DSM-IV criteria. Regarding dissection, briefly, BA9 was isolated from the lateral surface of the frontal lobe containing the middle frontal gyrus superior to the inferior frontal sulcus. Tissue blocks were stored at -80°C until processing for downstream applications. The collection and dissection process has been previously described in detail (Scarr et al., 2018).

**Supplementary Table 2:** Demographics of the Victorian Brain Bank cohort, postmortem samples of dorsolateral prefrontal cortex (BA9) from the left hemisphere

| Descriptive          | Group; mean (range)* |                  |                 |                  |
|----------------------|----------------------|------------------|-----------------|------------------|
|                      | CTRL                 | MDD              | BPD             | SCZ              |
| Subjects             | 20                   | 20               | 16              | 20               |
| Age at death (years) | 59.2 (32-80)         | 85.0 (27-87)     | 59.4 (31-79)    | 56.4 (30-82)     |
| Sex (male:female)    | 11:9                 | 11:9             | 8:8             | 11:9             |
| Suicide (no:yes)     | 19:1                 | 3:17             | 10:6            | 14:6             |
| Brain pH             | 6.3 (5.9-6.7)        | 6.5 (5.6-6.9)    | 6.3 (6.0-6.5)   | 6.3 (5.5-6.6)    |
| PMI (hours)          | 43.0 (17-72)         | 43.4 (11-72)     | 38.7 (8-63)     | 44.2 (20-66)     |
| Brain weight (grams) | 1354 (1140-1655)     | 1285 (1030-1573) | 1244 (952-1630) | 1337 (1110-1659) |

**Abbreviations:** CTRL, control; MDD, major depressive disorder; BPD, bipolar disorder; SCZ, schizophrenia; PMI, postmortem interval; RIN, RNA integrity number. \*Unless otherwise indicated

### Postmortem brain Series 3

Matosin et al.

The Munich Neurobiobank cohort (Series 3; Supplementary Table 1b) consists of 24 control subjects with ages evenly distributed over adulthood, from 37 to 88 years of age. Clinical records were provided by relatives and general practitioners and all assessments and postmortem evaluations were conducted in accordance with the Ethics Committee of the Faculty of Medicine, University of Heidelberg, Germany. Controls had no history of alcohol or drug abuse, severe physical or psychiatric illness. Tissue blocks (~1-1.5cm<sup>2</sup>) were dissected from the anterior-most point of the superior frontal gyrus, corresponding to BA9. Braak neuropathological examinations were staged at ≤2 for all subjects. Tissue blocks were stored at -80°C until processing for downstream applications.

**Supplementary Table 3:** Demographics from Munich Brain Bank, postmortem control cohort with samples from the dorsolateral prefrontal cortex (BA9)

| Descriptive             | Group; mean (range)* |
|-------------------------|----------------------|
|                         | CTRL                 |
| Subjects                | 24                   |
| Age at death (years)    | 65.5 (37-88)         |
| Sex (male:female)       | 13:11                |
| Hemisphere (left:right) | 11:13                |
| PMI (hours)             | 32.6 (13-71)         |
| RIN                     | 6.1 (3.0-8.3)        |

**Abbreviations:** CTRL, control; MDD, major depressive disorder; BPD, bipolar disorder; SCZ, schizophrenia; PMI, postmortem interval; RIN, RNA integrity number. \*Unless otherwise indicated

*Postmortem brain Series 4*

The Douglas-Bell Canada Brain Bank cohort (Series 4, Supplementary Table 4) consists of a total of 17 cases with major depressive disorder who died by suicide, and 17 matched controls. All cases were males, and samples matched by age, PMI and RIN. Cause of death was determined by the Quebec Coroner's office, and frozen grey matter from BA9 isolated by trained neuroanatomists. Psychological autopsies were performed using proxy-based interviews. Cases met criteria for MDD and died by suicide, and controls were individuals who died suddenly and did not have evidence of any axis I disorders. The study was approved by the Douglas Hospital Research Ethics Board. Written informed consent was received from the next of kin for each individual.

**Supplementary Table 4.** Demographics from Douglas-Bell Canada Brain Bank postmortem cohort with samples from the dorsolateral prefrontal cortex (BA9).

| Descriptive          | Group (mean±standard deviation*) |              |
|----------------------|----------------------------------|--------------|
|                      | Control                          | MDD          |
| Subjects             | 17                               | 17           |
| Age at death (years) | 38±4.32                          | 41.69±4.76   |
| Sex (male:female)    | 17:0                             | 17:0         |
| Cause of death       | Natural death (11), accident (6) | Suicide (17) |



Matosin et al.

|             |            |            |
|-------------|------------|------------|
| Brain pH    | 6.49±0.06  | 6.60±0.07  |
| PMI (hours) | 34.01±4.94 | 41.69±4.76 |
| RIN         | 6.16       | 6.47       |

**Abbreviations:** MDD, major depressive disorder; PMI, postmortem interval; RIN, RNA integrity number. \*Unless otherwise indicated

## 2. Antibody validation experiments

To validate the FKBP51 antibodies used in our study, immunoblots were performed in FKBP51 knock out (KO) cells. The KO cells were generated from the SH-SY5Y human neuroblastoma cell line using CRISPR-Cas9 (Martinelli et al.). Considering FKBP51 is lowly expressed at baseline, the synthetic glucocorticoid receptor agonist dexamethasone was also added to induced FKBP5 expression and increase visible expression of FKBP51 protein (Supplementary Figure 1). Protein was extracted from cell lysates and 20ug was loaded for immunoblot analyses. FKBP51 antibodies (Supplementary Table 5) were applied (on individually run membranes) at 1:1000, and membranes were imaged according to the general methods.

**Supplementary Table 5.** FKBP51 antibodies validated in FKBP51 knock-out cells

| Name                      | Type       | Concentration | Number     | Company                                   |
|---------------------------|------------|---------------|------------|-------------------------------------------|
| <b>Rabbit anti-FKBP51</b> | polyclonal | 1:1000        | #8245S     | Cell Signaling, Danvers, MA, USA          |
| <b>Rabbit anti-FKBP51</b> | polyclonal | 1:1000        | #A301-429A | Bethyl Laboratories, Montgomery, TX, USA  |
| <b>Mouse anti-FKBP51</b>  | polyclonal | 1:1000        | #D-4       | Santa Cruz Biotechnology, Dallas, TX, USA |

Matosin et al.

### 3. Primer design for real-time quantitative PCR experiments

**Supplementary Table 6.** RT-qPCR primer design

|   | Details  | FKBP5 target                                           | Region                               |
|---|----------|--------------------------------------------------------|--------------------------------------|
| 1 | IDT Ref  | Hs.PT.58.813038 (all transcripts Exon 11-12)           | <b>All transcripts</b><br>Exon 11-12 |
|   | Probe    | /56-FAM/CTG TTG AAT /ZEN/GCT GTG ACA AGG CCC /3IABkFQ/ |                                      |
|   | Primer 1 | ATG TGC TAC CTG AAG CTT AGA G                          |                                      |
|   | Primer 2 | CCC TCC TAT ACA AGC CTT TCT C                          |                                      |
| 2 | IDT Ref  | Hs.PT.58.20523859 (all transcripts Exon 5-6)           | <b>All transcripts</b><br>Exon 5-6   |
|   | Probe    | /56-FAM/AGAGATATG/ZEN/CCATTACTGTGCAAACCAGA/3IABkFQ/    |                                      |
|   | Primer 1 | GAACCATTTGTCTTTAGTCTTGGC                               |                                      |
|   | Primer 2 | CGAGGGAATTTAGGGAGACTG                                  |                                      |
| 3 | IDT Ref  | Hs.PT.39a.22214836 (GAPDH (NM_002046) Exon 2-3)        | <b>GAPDH</b><br>Exon 2-3             |
|   | Probe    | /56-FAM/AAGGTCGGA/ZEN/GTCAACGGATTGGTC/3IABkFQ/         |                                      |
|   | Primer 1 | ACATCGCTCAGACACCATG                                    |                                      |
|   | Primer 2 | TGTAGTTGAGGTCAATGAAGGG                                 |                                      |
| 4 | IDT Ref  | Hs.PT.39a.22214847 (ACTB Exon 1-2)                     | <b>ACTB</b><br>Exon 1-2              |
|   | Probe    |                                                        |                                      |
|   | Primer 1 |                                                        |                                      |
|   | Primer 2 |                                                        |                                      |

Matosin et al.

## B. SUPPLEMENTARY RESULTS

**Supplementary Table 7.** Sample sizes for genotype analyses

| Rs1360780, Sample size (n) |           |    |
|----------------------------|-----------|----|
|                            | T carrier | CC |
| Control                    | 108       | 64 |
| Schizophrenia              | 69        | 45 |
| Major Depression           | 78        | 62 |
| Bipolar                    | 32        | 28 |

**Supplementary Table 8.** Functional groupings of *FKBP5* CpGs

| CpG name   | chromStart | chromEnd | Position information     | Group name          | Sub-stratification |
|------------|------------|----------|--------------------------|---------------------|--------------------|
| cg05593667 | 35490743   | 35490744 | Distal TAD               | distal_TAD          |                    |
| cg02837122 | 35490787   | 35490788 | Distal TAD               |                     |                    |
| cg18468088 | 35490817   | 35490818 | Distal TAD               |                     |                    |
| cg20719122 | 35523699   | 35523700 | 3' downstream            | downstr_conserv     |                    |
| cg04192760 | 35523734   | 35523735 | 3' downstream            |                     |                    |
| cg07633853 | 35569471   | 35569472 | Intron 5                 | GRE_intron5         |                    |
| cg14284211 | 35570223   | 35570224 | Intron 5                 |                     |                    |
| cg00862770 | 35655763   | 35655764 | Transcription start site | TSS                 |                    |
| cg00140191 | 35656242   | 35656243 | Transcription start site |                     |                    |
| cg10913456 | 35656589   | 35656590 | Transcription start site |                     |                    |
| cg16012111 | 35656757   | 35656758 | Transcription start site |                     |                    |
| cg07843056 | 35656847   | 35656848 | Transcription start site |                     |                    |
| cg01294490 | 35656905   | 35656906 | Transcription start site |                     |                    |
| cg20813374 | 35657180   | 35657181 | Transcription start site |                     |                    |
| cg00130530 | 35657202   | 35657203 | Transcription start site |                     |                    |
| cg23416081 | 35693572   | 35693573 | Proximal enhancer        | Prox_enhancer_total | a                  |
| cg00052684 | 35694245   | 35694246 | Proximal enhancer        |                     | b                  |
| cg06937024 | 35695489   | 35695490 | Proximal enhancer        |                     | Prox_enhancer_1    |
| cg11845071 | 35695859   | 35695860 | Proximal enhancer        |                     |                    |
| cg00610228 | 35695933   | 35695934 | Proximal enhancer        |                     |                    |
| cg07485685 | 35696060   | 35696061 | Proximal enhancer        |                     |                    |
| cg17030679 | 35696299   | 35696300 | Proximal enhancer        |                     |                    |
| cg25114611 | 35696870   | 35696871 | Proximal enhancer        |                     | c                  |
| cg19226017 | 35697184   | 35697185 | Proximal enhancer        |                     | d                  |
| cg08915438 | 35697759   | 35697760 | Proximal enhancer        |                     | e                  |
| cg07944278 | 35699424   | 35699425 | Proximal enhancer        |                     | Prox_enhancer_2    |
| cg05741161 | 35699498   | 35699499 | Proximal enhancer        |                     |                    |
| cg26868354 | 35699951   | 35699952 | Proximal enhancer        |                     |                    |
| cg13719443 | 35700381   | 35700382 | Proximal enhancer        |                     |                    |
| cg10780318 | 35704148   | 35704149 | Prox TAD                 | Prox_TAD            |                    |
| cg01321308 | 35704223   | 35704224 | Prox TAD                 |                     |                    |

Abbreviation: TAD, topologically associated domain

Matosin et al.

**Supplementary Table 9.** Partial correlation of DNAm vs sex in each functional group and potentially independently functioning CpG after correcting for age, sex, race, PMI and batch correction. R represents the the partial correlation coefficient between DNAm and age variables after correcting for

|                          | all subjects       |          | all cases          |          | control            |          | schizophrenia      |          | depression         |          | bipolar            |          |
|--------------------------|--------------------|----------|--------------------|----------|--------------------|----------|--------------------|----------|--------------------|----------|--------------------|----------|
|                          | <i>P (nominal)</i> | <i>R</i> | <i>P (nominal)</i> | <i>R</i> | <i>P (nominal)</i> | <i>R</i> | <i>P (nominal)</i> | <i>R</i> | <i>P (nominal)</i> | <i>R</i> | <i>P (nominal)</i> | <i>R</i> |
| Distal_TAD               | 4.66E-01           | -0.03    | 3.40E-01           | -0.05    | 7.21E-01           | -0.03    | 8.76E-01           | -0.01    | 4.22E-01           | 0.07     | 7.46E-01           | 0.04     |
| <b>downstr_conserv</b>   | <b>2.24E-02</b>    | -0.10    | <b>8.73E-04</b>    | -0.19    | 1.64E-01           | 0.11     | <b>4.66E-02</b>    | -0.19    | 5.08E-01           | 0.06     | 7.42E-02           | -0.24    |
| GRE_intron5              | 1.33E-01           | -0.07    | 9.32E-01           | -0.09    | 3.51E-01           | -0.07    | 1.43E-01           | -0.14    | 5.00E-01           | 0.06     | 9.32E-01           | 0.01     |
| TSS                      | 2.05E-01           | -0.06    | 3.92E-01           | -0.05    | 4.79E-01           | -0.05    | 4.21E-01           | -0.08    | 4.54E-01           | -0.06    | 5.94E-01           | 0.07     |
| cg23416081 a             | 6.33E-02           | -0.08    | 1.20E-01           | -0.09    | <b>1.61E-02</b>    | -0.18    | 4.90E-01           | -0.07    | 5.04E-01           | -0.06    | 4.80E-01           | 0.10     |
| <b>cg00052684 b</b>      | <b>6.04E-03</b>    | -0.12    | <b>3.53E-02</b>    | -0.12    | <b>4.78E-02</b>    | -0.15    | 2.52E-01           | -0.11    | 7.74E-02           | -0.15    | 2.86E-01           | -0.15    |
| <b>Prox_enhancer_tot</b> | <b>1.09E-03</b>    | -0.15    | <b>9.77E-03</b>    | -0.14    | <b>3.94E-02</b>    | -0.16    | 2.91E-01           | -0.10    | <b>6.81E-03</b>    | -0.23    | 7.65E-01           | -0.04    |
| Prox_enhancer_1          | 4.82E-01           | -0.03    | 4.11E-01           | -0.05    | 8.89E-01           | 0.01     | 7.98E-01           | 0.02     | 1.56E-01           | -0.12    | 8.26E-01           | -0.03    |
| Prox_enhancer2           | 4.82E-01           | 0.03     | 5.21E-01           | 0.06     | 8.59E-01           | -0.01    | 2.03E-01           | 0.12     | <b>1.40E-02</b>    | -0.08    | 3.35E-01           | 0.09     |
| cg25114611 c             | 5.12E-02           | -0.09    | 2.44E-01           | -0.07    | 1.79E-01           | -0.10    | 1.20E-01           | -0.15    | 8.45E-01           | -0.02    | 9.08E-01           | -0.02    |
| <b>cg19226017 d</b>      | <b>3.57E-03</b>    | -0.13    | <b>7.38E-04</b>    | -0.19    | 9.34E-01           | 0.01     | <b>3.12E-02</b>    | -0.20    | <b>1.66E-03</b>    | -0.27    | 7.31E-01           | -0.05    |
| cg08915438 e             | 3.57E-01           | -0.04    | 9.18E-01           | -0.01    | 2.00E-01           | -0.10    | 7.40E-01           | 0.03     | 2.22E-01           | -0.11    | 9.70E-01           | -0.01    |
| Prox_TAD                 | 7.32E-01           | -0.02    | 7.05E-01           | -0.02    | 1.14E-01           | -0.12    | 7.26E-01           | -0.03    | 8.27E-01           | 0.02     | 3.90E-01           | 0.12     |

Matosin et al.

**Supplementary Table 10.** Case-control differences in DNAm between *FKBP5* functional CpG groups. Results of the coefficients for diagnoses derived from linear regressions are presented. Nominal and FDR corrected P values are reported. Comparisons  $P_{FDR} < 0.05$  and %max difference  $> 1\%$  are bolded.

|                        | All cases vs controls |              |        |                             | Schizophrenia vs controls |              |        |                             | Depression vs controls |              |        |                             | Bipolar vs controls |              |              |                             |
|------------------------|-----------------------|--------------|--------|-----------------------------|---------------------------|--------------|--------|-----------------------------|------------------------|--------------|--------|-----------------------------|---------------------|--------------|--------------|-----------------------------|
|                        | $P_{nom}$             | $P_{FDR}$    | t      | % mean dif (range)          | $P_{nom}$                 | $P_{FDR}$    | t      | % mean dif (range)          | $P_{nom}$              | $P_{FDR}$    | t      | % mean dif (range)          | $P_{nom}$           | $P_{FDR}$    | t            | % mean dif (range)          |
| <b>Distal_TAD</b>      | 0.482                 | 0.624        | 0.703  | +0.60% (0.198-1.99)         | 0.594                     | 0.644        | 0.553  | +4.78% (0.198-0.207)        | <b>0.005</b>           | <b>0.033</b> | -2.853 | <b>-5.03%</b> (0.198-0.187) | <b>0.010</b>        | <b>0.043</b> | 2.587        | <b>+5.34%</b> (0.198-0.208) |
| <b>downstr_conserv</b> | 0.235                 | 0.509        | -1.188 | -3.03% (0.742-0.719)        | 0.114                     | 0.354        | -1.587 | -1.26% (0.742-0.732)        | <b>0.004</b>           | <b>0.033</b> | -2.916 | <b>-5.70%</b> (0.742-0.699) | <b>0.001</b>        | <b>0.013</b> | <b>3.303</b> | <b>-0.41%</b> (0.742-0.739) |
| GRE_intron5            | 0.473                 | 0.624        | 0.719  | +0.58% (0.342-0.344)        | 0.509                     | 0.602        | 0.662  | -1.86% (0.342-0.366)        | 0.024                  | 0.078        | -2.263 | +0.01% (0.342-0.342)        | 0.043               | 0.093        | 2.033        | +6.50% (0.342-0.365)        |
| TSS                    | 0.538                 | 0.636        | -0.616 | +0.99% (0.248-0.250)        | 0.239                     | 0.444        | -1.180 | -0.28% (0.248-0.247)        | 0.809                  | 0.919        | 0.242  | +2.63% (0.248-0.254)        | 0.529               | 0.573        | -0.630       | +0.52% (0.248-0.249)        |
| <b>cg23416081 a</b>    | 0.145                 | 0.377        | 1.458  | +1.96% (0.276-0.271)        | 0.232                     | 0.444        | 1.199  | +2.69% (0.276-0.269)        | 0.019                  | 0.078        | -2.361 | -4.01% (0.276-0.265)        | <b>0.010</b>        | <b>0.043</b> | 2.610        | <b>+3.99%</b> (0.276-0.287) |
| cg00052684 b           | 0.372                 | 0.624        | -0.893 | -4.52% (0.525-0.501)        | 0.319                     | 0.518        | -0.998 | -7.24% (0.525-0.487)        | 0.788                  | 0.919        | 0.270  | +2.21% (0.525-0.513)        | 0.408               | 0.535        | -0.829       | -4.56% (0.525-0.501)        |
| Prox_enhancer_tot      | 0.144                 | 0.377        | -1.462 | +0.71% (0.297-0.295)        | 0.136                     | 0.354        | -1.495 | +2.29% (0.297-0.291)        | 0.891                  | 0.919        | -0.137 | +0.77% (0.297-0.300)        | 0.388               | 0.535        | -0.866       | +1.07% (0.297-0.294)        |
| Prox_enhancer_1        | 0.440                 | 0.624        | -0.773 | +0.04% (0.095-0.095)        | 0.477                     | 0.602        | -0.712 | -1.35% (0.095-0.093)        | 0.912                  | 0.919        | -0.111 | +1.50% (0.095-0.096)        | 0.986               | 0.986        | -0.017       | -0.59% (0.095-0.094)        |
| Prox_enhancer2         | 0.822                 | 0.891        | 0.225  | +3.13% (0.156-0.161)        | 0.917                     | 0.917        | -0.104 | +0.11% (0.156-0.156)        | 0.170                  | 0.368        | 1.375  | +6.16% (0.156-0.166)        | 0.417               | 0.535        | -0.814       | +2.05% (0.156-0.159)        |
| <b>cg25114611 c</b>    | <b>0.001</b>          | <b>0.007</b> | -3.251 | <b>-2.94%</b> (0.701-0.681) | <b>0.001</b>              | <b>0.004</b> | -3.361 | <b>-4.25%</b> (0.701-0.671) | 0.683                  | 0.919        | -0.408 | -1.59% (0.701-0.690)        | 0.019               | 0.052        | -2.367       | -3.47% (0.701-0.677)        |
| cg19226017 d           | 0.944                 | 0.944        | 0.071  | +0.62% (0.801-0.806)        | 0.394                     | 0.569        | 0.853  | +0.01% (0.801-0.801)        | 0.919                  | 0.919        | -0.102 | +1.95% (0.801-0.816)        | 0.082               | 0.152        | -1.745       | -1.21% (0.801-0.791)        |
| <b>cg08915438 e</b>    | 0.037                 | 0.160        | -2.095 | -0.61% (0.762-0.757)        | <b>0.001</b>              | <b>0.004</b> | -3.446 | <b>-1.88%</b> (0.762-0.747) | 0.042                  | 0.109        | 2.040  | +0.63% (0.762-0.766)        | 0.453               | 0.534        | -0.751       | -0.99% (0.762-0.754)        |
| <b>Prox_TAD</b>        | <b>0.000</b>          | <b>0.000</b> | 3.855  | <b>+7.57%</b> (0.299-0.247) | <b>0.000</b>              | <b>0.000</b> | 3.847  | <b>+7.59%</b> (0.299-0.247) | 0.251                  | 0.466        | -1.150 | +5.85% (0.299-0.243)        | 0.020               | 0.052        | 2.343        | +11.38% (0.299-0.255)       |

**Abbreviations:** % mean dif: = % difference between means of controls vs case groups, range = mean of controls-mean of cases. Nom = nominal.

Matosin et al.

**Supplementary Table 11.** Partial spearman correlations (covarying for sex, race and PMI) of DNAm in each individual CpG/functional region with age, in the total cohort, ages 14 to 75 years. R values, nominal P and FDR-corrected P values are reported.

|                   | <b>R value</b> | <b>P<sub>NOM</sub></b> | <b>P<sub>FDR</sub></b> |
|-------------------|----------------|------------------------|------------------------|
| Total_gex         | 0.3137577      | 7.73E-13               | 1.35E-12               |
| distal_TAD        | 0.4649173      | 4.50E-28               | 1.05E-27               |
| downstr_conserv   | -0.0426742     | 3.42E-01               | 3.46E-01               |
| GRE_intron5       | -0.4587783     | 2.73E-27               | 5.45E-27               |
| TSS               | -0.0489672     | 2.75E-01               | 3.21E-01               |
| Prox_enhancer_tot | -0.7883986     | 9.92E-107              | 6.94E-106              |
| Prox_enhancer_1   | -0.1017775     | 2.31E-02               | 2.94E-02               |
| Prox_enhancer2    | -0.1240663     | 5.56E-03               | 7.79E-03               |
| Prox_TAD          | -0.0423328     | 3.46E-01               | 3.46E-01               |
| cg23416081 a      | -0.7050586     | 4.68E-76               | 2.19E-75               |
| cg00052684 b      | -0.2127109     | 1.67E-06               | 2.60E-06               |
| cg25114611 c      | -0.5067513     | 7.61E-34               | 2.13E-33               |
| cg19226017 d      | -0.5995894     | 6.17E-50               | 2.16E-49               |
| cg08915438 e      | -0.8230384     | 6.16E-124              | 8.62E-123              |



Matosin et al.

**Supplementary Table 12.** Case-control differences in *FKBP5* gex between excitatory neuron sub-clusters from Series 4 using linear regression modelling. Results of the coefficients for diagnoses derived from the linear regressions (*lm* function) are presented. Nominal and FDR-corrected P values for multiple comparisons across cell types are reported.

| Major/sub-cluster name          | Cortical layer(s) | t-value       | P <sub>nom</sub> | P <sub>FDR</sub> |
|---------------------------------|-------------------|---------------|------------------|------------------|
| Astrocytes                      | -                 | 1.079         | 0.29058          | 0.5749333        |
| Endothelium                     | -                 | 0.328         | 0.744114         | 0.744114         |
| Inhibitory                      | -                 | 0.695         | 0.4928           | 0.5749333        |
| Microglia                       | -                 | 1.335         | 0.18717          | 0.5749333        |
| Oligodendrocytes                | -                 | -0.731        | 0.471            | 0.5749333        |
| Oligodendrocyte progenitor cell | -                 | 0.766         | 0.4445           | 0.5749333        |
| Excitatory                      | -                 | -1.776        | 0.0267           | 0.1869           |
| Ex 2                            | 5                 | 0.066         | 0.948            | 0.9480000        |
| Ex 3                            | 4-5               | 0.478         | 0.638            | 0.7443333        |
| Ex 4                            | 6                 | -0.687        | 0.4990           | 0.6986000        |
| Ex 6                            | 4-6               | 0.729         | 0.4723           | 0.6986000        |
| Ex 7                            | 4-6               | -0.978        | 0.33673          | 0.6986000        |
| Ex 8                            | 5-6               | -1.596        | 0.1226           | 0.4291000        |
| Ex 10                           | 2-4               | <b>-2.190</b> | <b>0.0364</b>    | 0.2548000        |

Matosin et al.

**Supplementary Table 13.** Results of Spearman correlations assessing the relationship between *FKBP5* gex with age in each cell cluster from Series 4. Nominal and FDR-corrected P values are reported.

| Major/sub-cluster name          | Cortical layer(s) | R-value          | P <sub>nom</sub> | P <sub>FDR</sub> |
|---------------------------------|-------------------|------------------|------------------|------------------|
| Oligodendrocytes                | -                 | <b>0.4011025</b> | <b>0.0187</b>    | <b>0.0479</b>    |
| Astrocytes                      | -                 | <b>0.4015578</b> | <b>0.0205</b>    | <b>0.0479</b>    |
| Oligodendrocyte progenitor cell | -                 | 0.3309074        | 0.0559           | 0.0979           |
| Inhibitory neurons              | -                 | 0.2962397        | 0.0889           | 0.1245           |
| Endothelial cells               | -                 | 0.1257452        | 0.4786           | 0.5584           |
| Microglia                       | -                 | 0.09823437       | 0.5927           | 0.5927           |
| Excitatory neurons              | -                 | <b>0.6638643</b> | <b>1.87E-05</b>  | <b>1.31E-04</b>  |
| Ex 2                            | 5                 | 0.1197           | 0.5138           | 0.7193           |
| Ex 3                            | 4-5               | 0.3377615        | 0.0849           | 0.1827           |
| Ex 4                            | 6                 | 0.3023           | 0.1044           | 0.1827           |
| Ex 6                            | 4-6               | 0.3122614        | 0.0722           | 0.1827           |
| Ex 7                            | 4-6               | 0.06969655       | 0.6953           | 0.7267           |
| Ex 8                            | 5-6               | 0.6322           | 0.7267           | 0.7267           |
| <b>Ex 10</b>                    | <b>2-4</b>        | <b>0.69978</b>   | <b>4.11E-06</b>  | <b>2.88E-05</b>  |

# C. Supplementary Figure

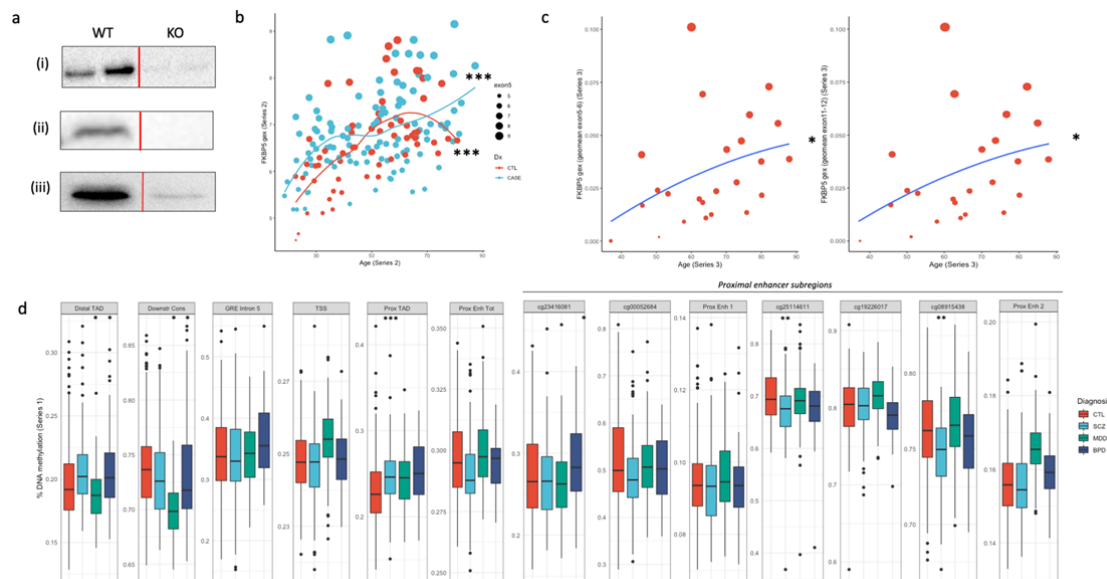

**Supplementary Figure 1.** (a) Validation of FKBP5 antibodies in *FKBP5* knock-out HELA cells using immunoblot. All FKBP5 antibodies [(i) Cell Signalling #8245S, (ii) Bethyl #A301-429A, (iii) Santa Cruz #D-4] showed specific expression in wildtype (WT) cells but not *FKBP5* knock-out (KO) cells, indicating their specificity. (b) Association of *FKBP5* gene expression with age in Series 2. *FKBP5* was positively and significantly associated with age in both cases and controls, with heightened expression at older ages in cases. (c) Results of quantitative PCR experiments assessing the correlation between *FKBP5* expression with age in Series 3. *FKBP5* was significantly associated with age with two independent probes targeting all transcripts either at *FKBP5* exon 5-6 or 11-12. (d) DNAm differences across the different *FKBP5* CpGs (individual or grouped, as per Supplementary Table 8) for controls, schizophrenia, major depression and bipolar disorder subjects. **Abbreviations:** CTL, control, distal\_TAD, distal topologically associated domain; DNAm, DNA methylation; Downstr\_Cons, downstream conserved region; gex, gene expression; MDD, major depressive disorder; GRE, glucocorticoid response element; SCZ, schizophrenia; TSS, transcription start site; Prox Enh Tot, total DNAm across the total proximal enhancer region; Prox Enh 1/2, DNAm levels in subsets of proximal enhancer region (detailed in Supplementary Table 8); Prox\_TAD, proximal topologically associated domain. Series refer to the cohorts used in each analyses, as detailed in Table 1. Asterix indicate significance levels: \*P<0.05, \*\*\*P<0.001.

Matosin et al.

# D. References

- Scarr E, Udawela M, Thomas EA, et al. (2018) Changed gene expression in subjects with schizophrenia and low cortical muscarinic M1 receptors predicts disrupted upstream pathways interacting with that receptor. *Mol Psychiatry* 23(2): 295-303.
- Tao R, Davis KN, Li C, et al. (2017) GAD1 alternative transcripts and DNA methylation in human prefrontal cortex and hippocampus in brain development, schizophrenia. *Mol Psychiatry*. Epub ahead of print 2017/05/10. DOI: 10.1038/mp.2017.105.

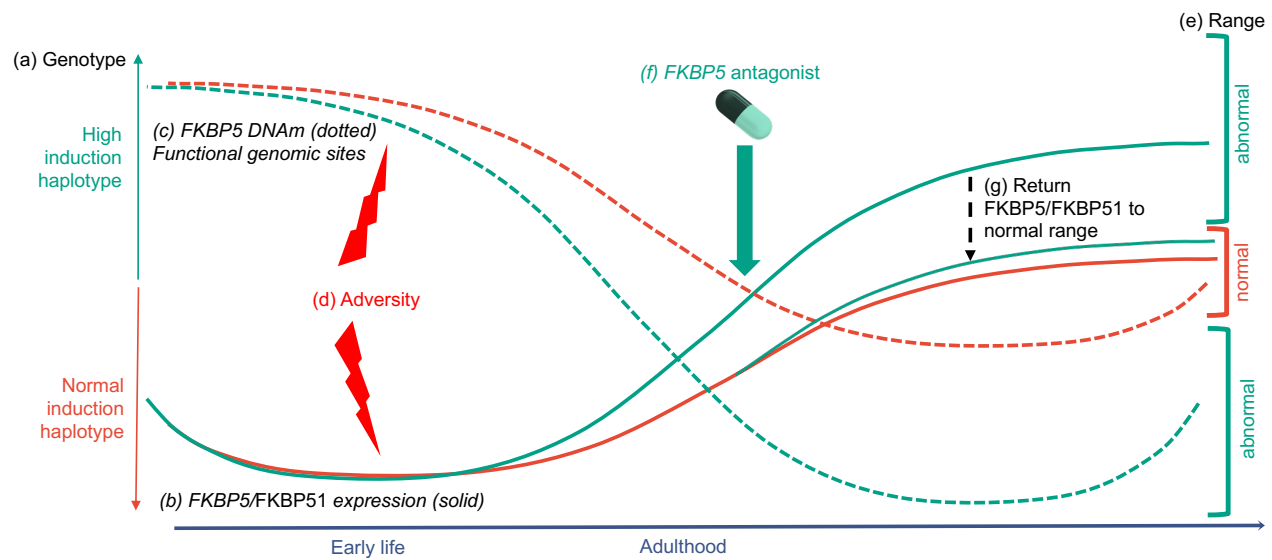

Figure 1

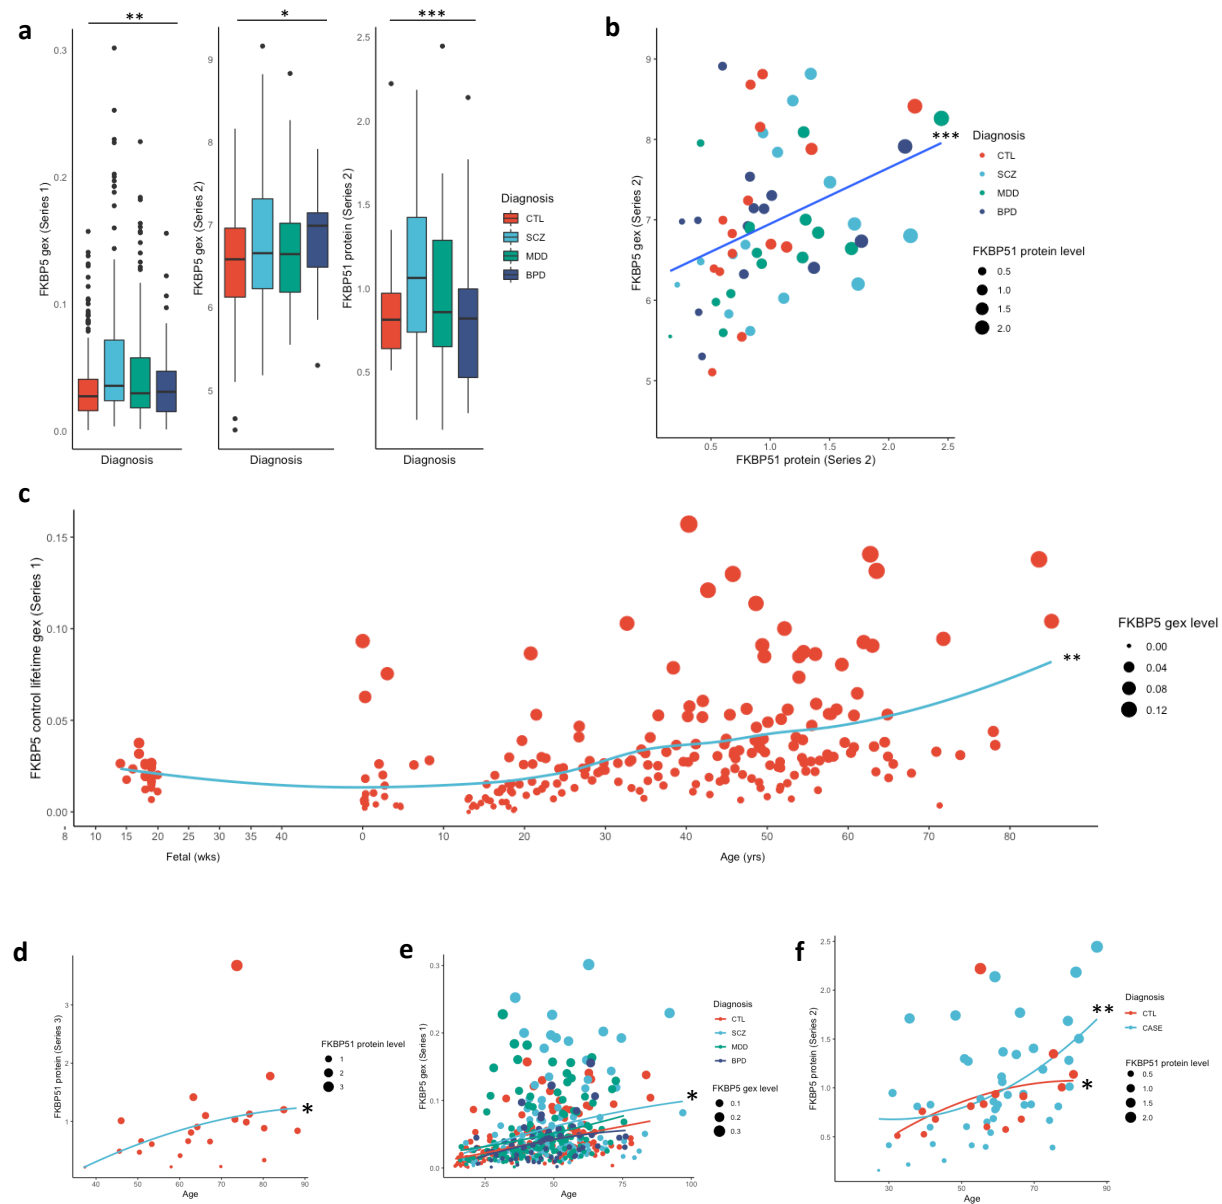

Figure 2



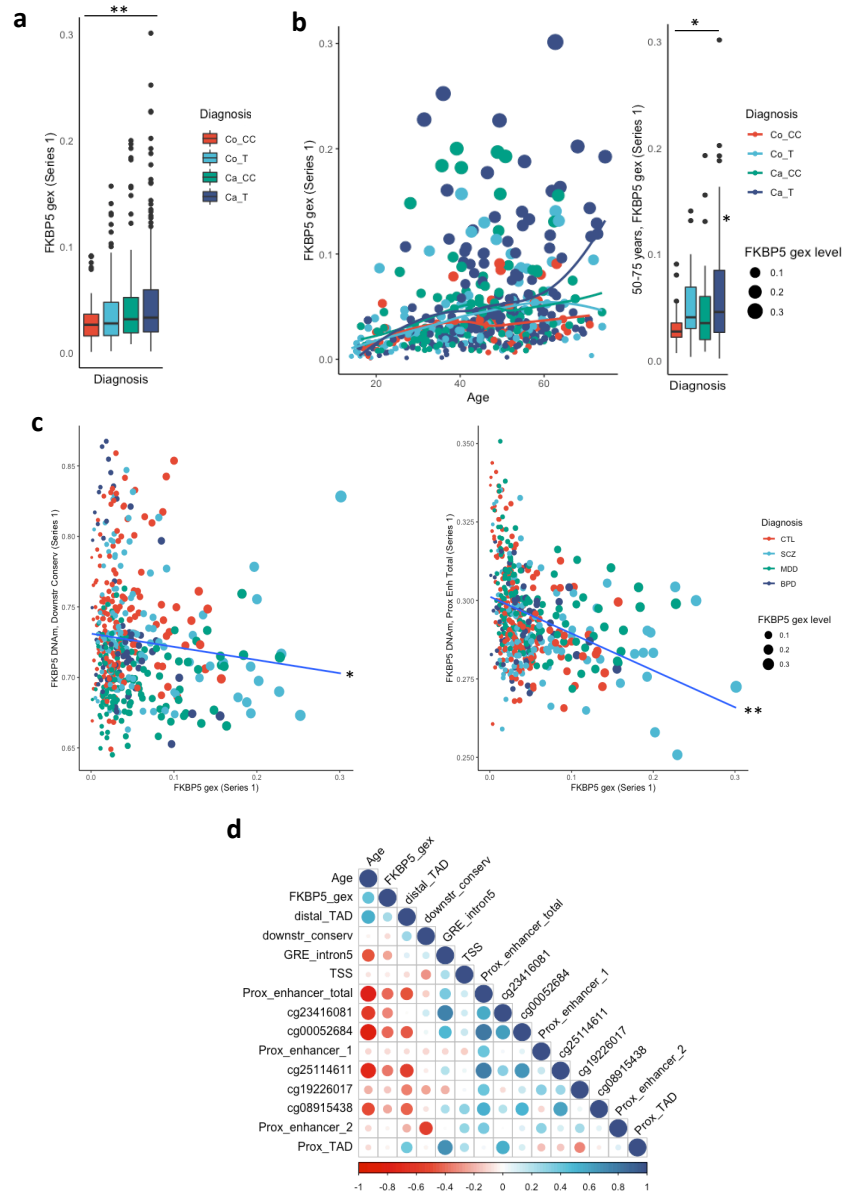

Figure 3

a

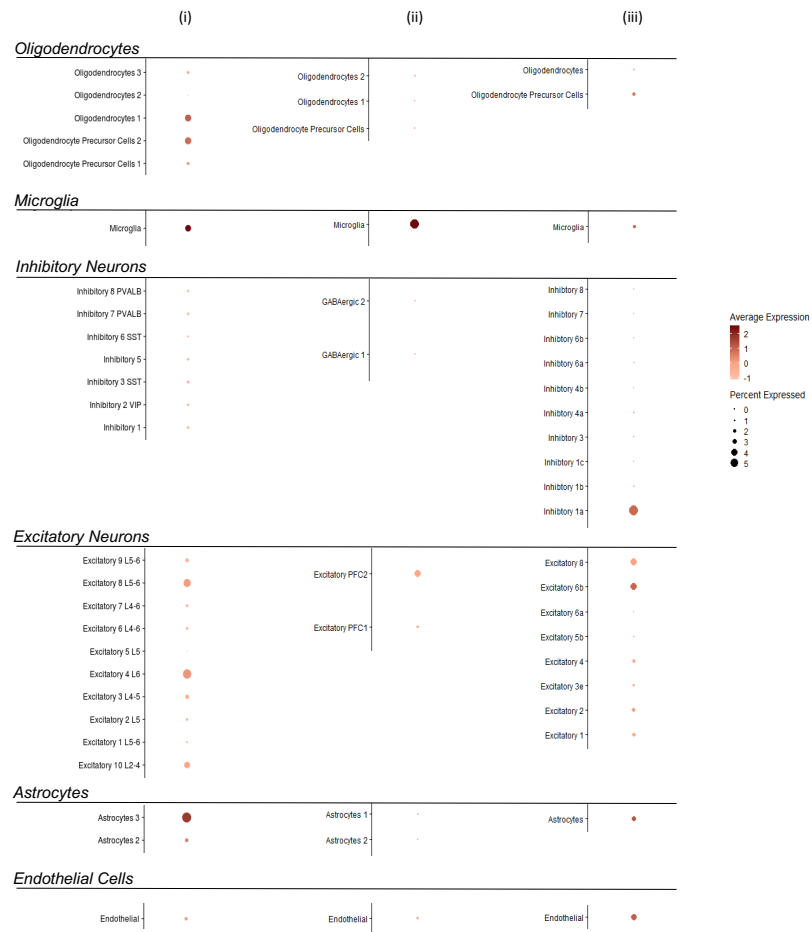

b

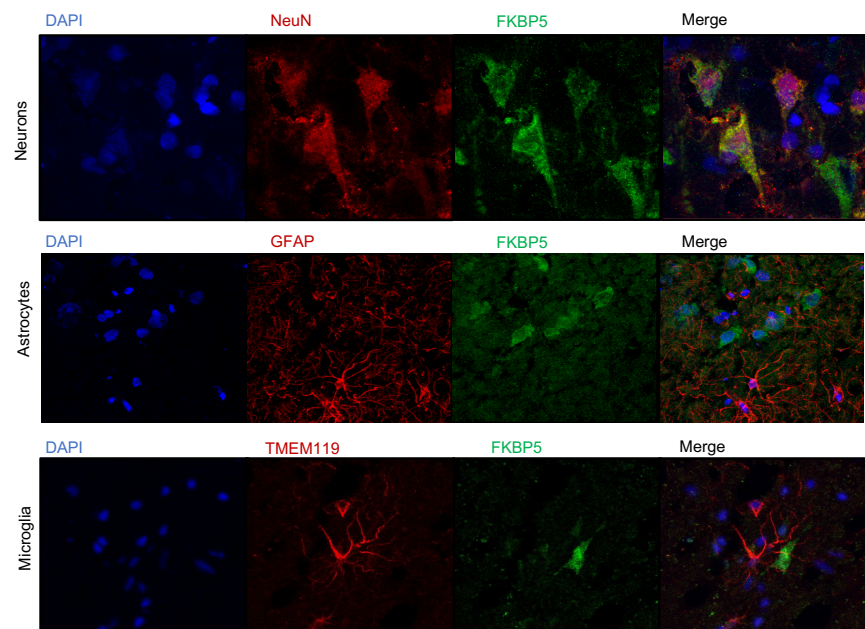

c

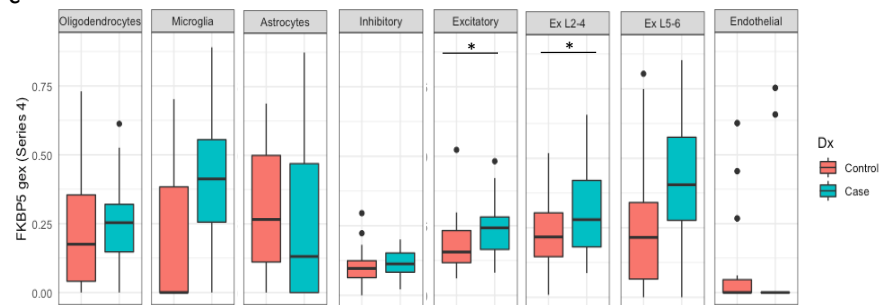

Figure 4

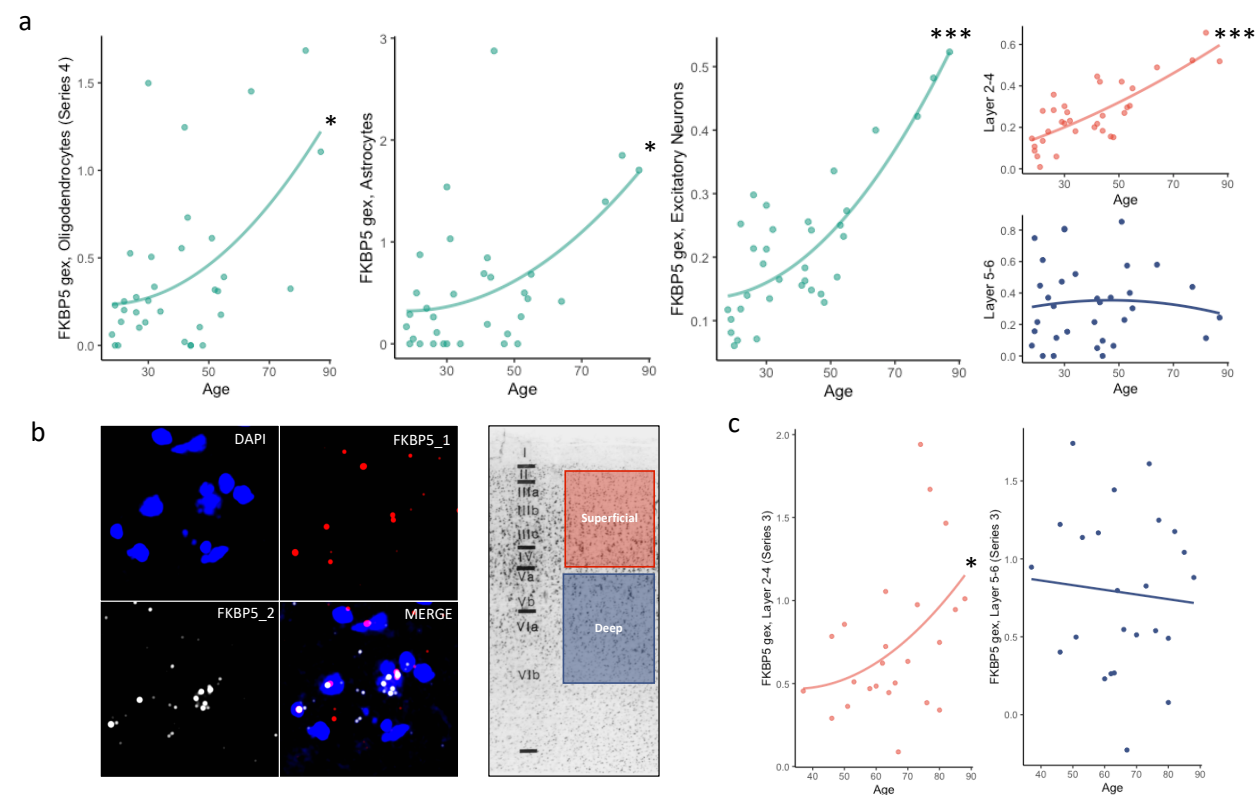

Figure 5

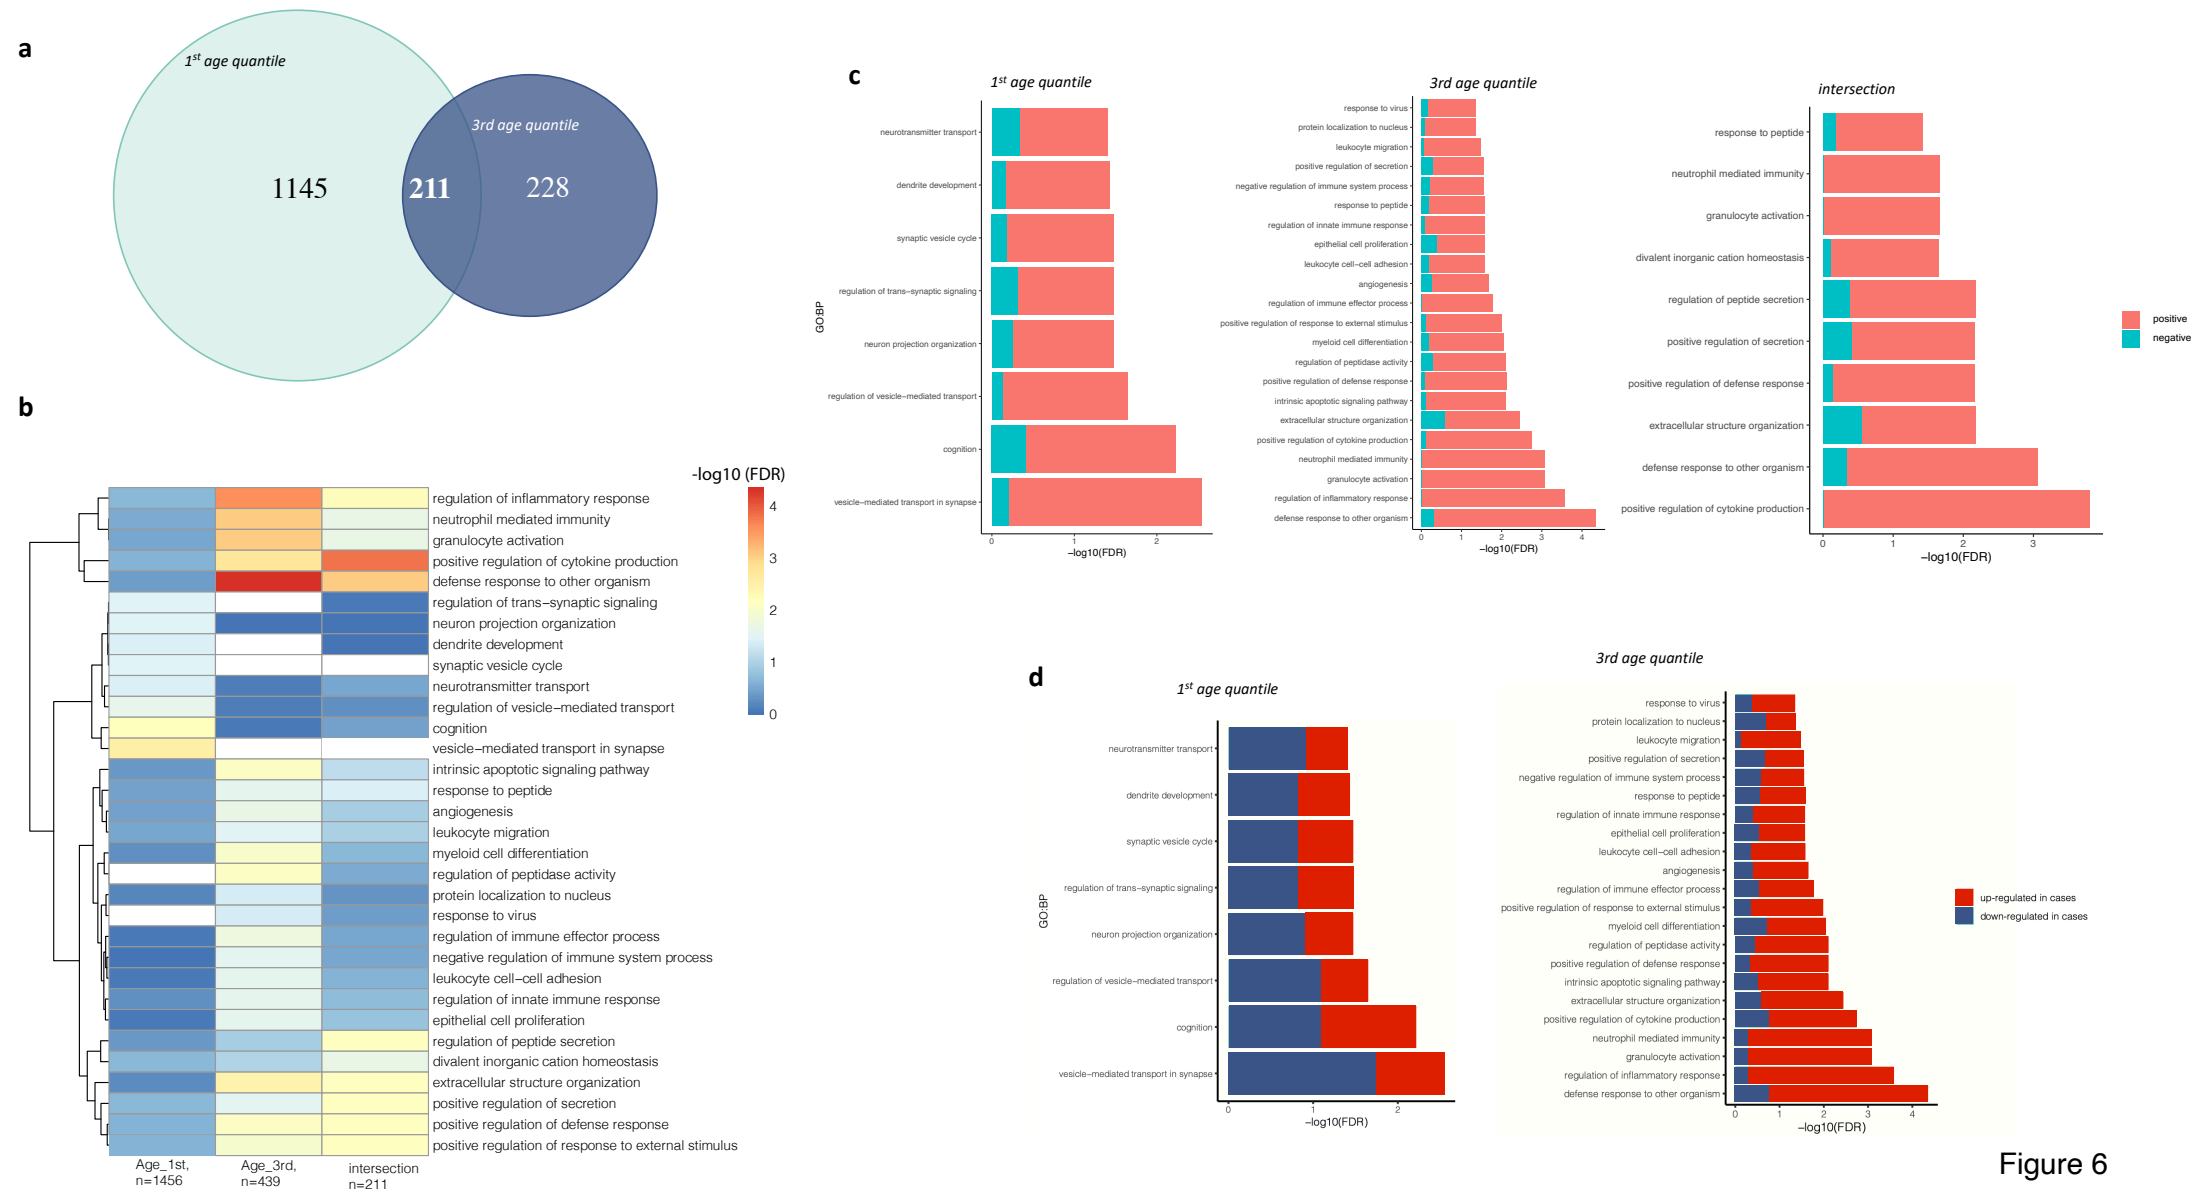

Source: https://biorxiv.org/content/10.1101/2021.01.27.428487v1.full.pdf
